# Supplementary material for: Sedimentary archives of climate and sea-level changes during the Holocene in the Rhone prodelta (NW Mediterranean Sea)
Source: Copernicus journal article supplement (doi:10.5194/cp-2016-57), 2016-06-27
Supplement: Supplementary file [file cp-2016-57-AC4-supplement.pdf]

# Sedimentary archives of climate and sea-level changes during the Holocene in the Rhone prodelta (NW Mediterranean Sea)

Anne-Sophie Fanget<sup>1</sup>, Maria-Angela Bassetti<sup>1</sup>, Christophe Fontanier<sup>2</sup>, Alina Tudryn<sup>3</sup>, Serge Berné<sup>1,2</sup>

<sup>1</sup>Université de Perpignan Via Domitia, Centre de Formation et de Recherche sur les Environnements Méditerranéens (CEFREM), UMR 5110-CNRS, F-66860, Perpignan, France

<sup>2</sup>IFREMER, Laboratoire Environnements Sédimentaires, BP70, 29280 Plouzané, France

<sup>3</sup> GEOPS UMR 8148, Univ. Paris-Sud, CNRS, Université Paris-Saclay, Rue du Belvédère, Bât. 504-509, 91405 Orsay, France

Correspondence to: Anne-Sophie Fanget (annesophie.fanget@univ-perp.fr)

**Abstract.** A 7.38 m-long sediment core was collected from the eastern [partsection](#) of the Rhone prodelta (NW Mediterranean) at 67-m water depth. A multi-proxy study ([including](#) sedimentary facies, benthic foraminifera ~~and~~, ostracods, [and](#) clay mineralogy, ~~and major elements from XRF~~) provides a multi-decadal to century-scale record of climate and sea-level changes during the Holocene. The early Holocene is marked by alternative silt and clay layers interpreted as distal tempestites deposited in a context of rising sea level. This interval contains shallow infra-littoral benthic meiofauna (e.g. *Pontocythere elongata*, *Elphidium* spp., *Quinqueloculina lata*) and formed between ca. 20 and 50 m water depth. The middle Holocene (ca. 8.3 to 4.5 ka cal. BP), is characterized, at the core site, by a period of sediment starvation (accumulation rate of ca. 0.01 cm yr<sup>-1</sup>) resulting from the maximum landward shift of the shoreline and the Rhone outlet(s). From a sequence stratigraphic point of view, this condensed [intervalsection](#), about 35 cm-thick, ~~is a Maximum Flooding Surface that~~ can be identified on seismic profiles as [a Maximum Flooding Surface that marks](#) the transition between delta retrogradation and delta progradation. ~~The transition between the early Holocene deposits and the middle Holocene condensed section~~ is marked by ~~very distinct changes~~ [a gradual change](#) in all proxy records. Following the stabilization of ~~the global~~ sea level [at a global scale](#), the late Holocene is marked by the establishment of prodeltaic conditions at the core site, as shown by the lithofacies and by the presence of benthic meiofauna typical of the modern Rhone prodelta (e.g. *Valvulineria bradyana*, *Cassidulina carinata*, *Bulimina marginata*). Several periods of increased fluvial discharge are also emphasized by the presence of species commonly found in brackish and shallow water environments (e.g. *Leptocythere*). Some of these periods correspond to the multi-decadal to centennial late Holocene humid periods recognized in Europe (i.e. the 2.8 ka event and the Little Ice Age). Two other periods of increased runoffs at ca. 1.3 and 1.1 ka cal. BP are recognized, and are likely to reflect periods of regional climate deterioration that are observed in the Rhone watershed. [Conversely, the Migration Period Cooling \(ca. 1.4 ka cal. BP\) and the Medieval Climate Anomaly \(ca. 950-1250 AD\) corresponds locally to periods of increased dryness.](#)

Keywords: Holocene. Delta. Benthic meiofauna. Sea level. Rapid climate changes. Hydrology.

## 1. Introduction

Deltas comprise a subaerial delta plain, where river processes dominate, a coarser-grained delta front where river and basinal processes interact, and a muddy submarine prodelta dominated by oceanic processes (Bhattacharya and Giosan, 2003; Galloway, 1975; Postma, 1995). Most of the world's deltas were initiated during the early Holocene, between ca. 9.5 and 6 ka cal. BP, owing to a deceleration of [global](#) sea-level rise (Stanley and Warne, 1994). They constitute key element of the continental margin system as they represent the first sink of sediments delivered by rivers (Trincardi et al., 2004).

Over the last ~~decades~~[decennia](#), numerous [studies](#)~~investigations~~ have documented the land-sea evolution of these systems including the Amazon delta (Nittrouer et al., 1986), the Mekong delta (Ta et al., 2002; Xue et al., 2010), the Yellow delta (Liu et al., 2004a; Liu et al., 2007), and the ~~Po~~-delta [of the Po River](#) (Amorosi et al., 2008; Cattaneo et al., 2003). The Rhone delta, ~~is~~ one of the most important of the Mediterranean Sea, ~~and~~ has also been widely investigated combining seismic, sedimentological and micropaleontological approaches (Boyer et al., 2005; Fanget et al., 2014; Fanget et al., 2013a; Fanget et al., 2013b; Gensous et al., 1993; Labaune et al., 2005).

In this paper, we study the ~~sedimentary~~ evolution of the Rhone prodelta [in terms of sedimentary environments](#), during the last ca. 10.5 ka cal. BP, as marked by changes in lithofacies and benthic meiofaunal assemblages (i.e. foraminifera and ostracods), [and](#) in relation to the Holocene sea-level rise and climate changes. This study shows that (1) major phases of sea-level rise and delta evolution can be clearly identified based on several independent proxy records, and that (2) changes in fluvial discharge inferred, particularly, from ostracod assemblages in the upper part of the core are linked to the last major periods of rapid climate [change](#)~~changes~~ of the Holocene (Mayewski et al., 2004; Wanner et al., 2014).

## 2. Regional geological and climatic setting

### 2.1. Geological ~~history~~[evolution](#) of the Rhone subaqueous delta

In the Gulf of Lions (NW Mediterranean), the Rhone delta (Fig. 1) occupies a ~~deeply~~[deep valley](#) incised [during the](#) Messinian ~~valley~~[and](#) infilled with ~~thick~~ ~~(ca. 2 km)~~[of](#) Plio-Quaternary sediments (Lofi et al., 2003), mainly delivered by the Rhone River (Aloisi et al., 1977). For the last ca. 500 ka, borehole data demonstrated that shelf deposits are primarily made-up of forced-regressed sequences formed in response to 100-kyr glacio-eustatic cycles (Bassetti et al., 2008; Frigola et al., 2012; Sierro et al., 2009). These authors also demonstrated that higher frequency cycles, as well as sub-orbital climate changes, were nicely recorded within paleo-prodeltaic sedimentary archives. Following the Last Glacial Maximum (LGM, ca. 21 ka cal. BP; Mix et al., 2001), rapid sea-level rise led to the retrogradation of Rhone delta, and formation of a wedge of transgressive (backstepping) deposits thickening landward. The most prominent feature is an elongated paleo-deltaic complex, named the Early Rhone Deltaic Complex (Berné et al., 2007), and formed during the Younger Dryas and the Preboreal (Fig. 1). After ca. 7 ka, stabilization of sea level allowed the progradation of a series of regressive deltaic lobes (Fanget et al., 2014), corresponding to the overall eastward migration of the Rhone distributaries. In total, these transgressive

and regressive deposits form the Rhone subaqueous delta that reaches, along the modern delta front, up to 50 m in thickness, and pinches out at a present water depth of ca. 90 m (Gensous and Tesson, 1997).

The early Holocene deposits (called seismic unit U500), which rest on a wave ravinement surface (called D500), formed a transgressive parasequence (Labaune et al., 2005) made of tempestite deposits (Fanget et al., 2014). They are separated from middle and late Holocene deposits by a condensed section which corresponds on seismic profile to a Maximum Flooding Surface (MFS, called D600), which corresponds to a condensed interval. The age of this surfacethe MFS varies along-strike between ca. 8 and 3 ka cal. BP, and reflects, at a given site, the duration of condensation and/or erosion (Fanget et al., 2014). After the stabilization of global sea level (ca.7 ka cal. BP), the middle and late Holocene Rhone outlets shifted progressively eastward, under natural and/or anthropic influence. As a result, several deltaic lobes are formed (Fig. 1) (Arnaud-Fassetta, 1998; L'Homer et al., 1981; Provansal et al., 2003; Rey et al., 2005; Vella et al., 2008; Vella et al., 2005). Saint Ferréol, which is related to the "Rhône de Saint Ferréol" Channel, is the first and largest paleo-deltaic lobe. It started to prograde around 7 ka cal. BP (L'Homer et al., 1981). The Ulmet lobe, located eastward and linked to the "Rhône d'Ulmet" Channel formed simultaneously to the Saint Ferréol lobe. Westward of the Saint Ferréol lobe, the Peccais lobe, related to the "Rhône de Peccais" Channel, appeared to be posterior to the erosion of the St Ferréol lobe (Rey et al., 2005; Vella et al., 2005). During the Little Ice Age, the Bras de Fer lobe, linked to the "Rhône de Bras de Fer" Channel, formed between 1587 and 1711 AD (Arnaud-Fassetta, 1998). Until 1650 AD, the "Rhône de Bras de Fer" Channel is considered as synchronous to the "Rhône du Grand Passon" Channel (Arnaud-Fassetta, 1998). The "Rhône de Bras de Fer" Channel shifted to the east up to the present-day position of the Grand Rhone River after several severe floods that occurred in 1709-1711 AD. The progradation of these lobes is primarily influenced by changes of sediment fluxes (Arnaud-Fassetta, 2002; Bruneton et al., 2001; Provansal et al., 2003), and thus by climate.

## 2.2. Holocene climate and its regional characteristics

High fluctuations in rainfall and low-amplitude temperature variations are observed during the Holocene (Davis et al., 2003; Mayewski et al., 2004; Seppä et al., 2009; Wanner et al., 2008; Wanner et al., 2011). Examination of globally distributed paleoclimate records led to identify 8 to 10 multi-decadal to century-scale cooling events interrupting periods of relatively stable and warmer climate (Mayewski et al., 2004; Wanner et al., 2008; Wanner et al., 2014; Wanner et al., 2011). These periods are known as Rapid Climate Changes (RCC; Mayewski et al., 2004) or Cold Relapses (CRCRs; Bassetti et al., 2016; Jalali et al., 2016; Wanner et al., 2014). The 8.2 ka cal. BP cold eventrelapse (CR0, Table 1) occurred duringtook place at the early beginning of the Holocene (Barber et al., 1999), a period of progressive warming that induced ice cap melting and freshwater outbursts to the oceans from North American glacial lakes.

During the warm middle Holocene, the mostseveral significant events in terms of temperature occurredepisodes were identified at 6.4, 5.3 and 4.2 ka cal. BP (CR1, CR2 and CR3, respectively; Table 1) (Walker et al., 2012; Wanner et al., 2014). The 4.2 ka event, that may have played a role in the collapse of various civilizations (Magny et al., 2013), is characterized by increased drought in North America, Asia and South Mediterranean region.

Mis en forme : Police :10 pt, Non Gras, Non souligné

During the cooler late Holocene, the 2.8 ka cal. BP cold ~~relapseperiod~~ (CR4, Table 1) might be ~~responsible for~~ at the origin of the decline of the Late Bronze Age civilization (Do Carmo and Sanguinetti, 1999; Weiss, 1982), and CR5 (Table 1) matches the Migration Period that occurred around 1.4 ka cal. BP (Wanner et al., 2014). The late Holocene cooling trend ~~eliminated~~ reached the highest development during the Little Ice Age (LIA, CR6 in Table 1) between the 13<sup>th</sup> and 19<sup>th</sup> centuries (Frezza and Carboni, 2009).

In the Rhone catchment area, these CR (or at least CR0 and CR6) are marked by increased river runoff. CR0, or the so-called 8.2 ka event (Alley et al., 1997), is indeed marked by high lake levels ~~due to~~ generated by more intense rainfall (Magny and Begeot, 2004; Magny et al., 2003). The LIA (CR6), which is well-documented in the Rhone watershed, is ~~characterized~~ marked by a period of significant Alpine glacier advance (Goehring et al., 2011; Ivy-Ochs et al., 2009), high lake levels (Magny et al., 2010), and ~~marked an~~ increase of Rhone River floods (Pichard, 1995; Pichard and Roucaute, 2014).

### 3. Material and Methods

The present paper is based on a multi-proxy ~~analysis~~ study of a 7.38 m-long piston core (RHS-KS55) collected in front of the paleo-“Rhône de Bras de Fer” and “Grand Passon” Channels at 67 m water depth (latitude = N 43°14.35'; longitude = E 4°40.96') during the RHOSOS oceanographic cruise (*R/V “Le Suroît”*, September 2008).

The detailed architecture of the Rhone subaqueous delta was determined from high-resolution seismic data (2000-5200 Hz Chirp system), together with core data constrained by <sup>14</sup>C dates (Fanget et al., 2014). Radiometric dates were measured with accelerator mass spectrometer (AMS) <sup>14</sup>C on ~~well preserved~~ benthic foraminifera or shells at Poznan Radiocarbon Laboratory (PRL, Poland), and at *Laboratoire de Mesure 14C* (LMC14) at *Commissariat à l'Energie Atomique* (CEA, France). Nevertheless, ~~due to~~ because of the low quantity of biogenic ~~material~~ carbonates in the proximal part of the Rhone prodelta, we experienced difficulties in dating core RHS-KS55 and observed some age inversions. Based on seismic and lithofacies correlations at the regional scale (Fanget et al., 2014), we excluded some <sup>14</sup>C dates for core RHS-KS55. As a result, eight robust <sup>14</sup>C dates were used to create the age model for the last ca. 9 kyr cal. BP. Ages are  $\delta^{13}\text{C}$ -normalised conventional <sup>14</sup>C years, and are corrected for an assumed air-sea reservoir effect of 400 years. Calendar ages were calculated using the program CLAM (version 2.2, Blaauw, 2010) and the Marine 13 calibration curve (Reimer et al., 2013). The age model was based on the linear interpolation between the dated levels using basic (non-Bayesian) age-depth modeling software (Blaauw, 2010).

Core RHS-KS55 was split lengthwise, ~~photographed, and visually described in order to identify sedimentological facies.~~ Core RHS KS55 was then analyzed using an Avaatech XRF Core Scanner (Richter et al., 2006) at IFREMER (Brest, France). Semi quantitative analyses of major and minor elements were performed by scanning the surface of split sediment cores with a sampling step of 1 cm and a counting time of 20 s. Two runs with X-ray source voltages and intensities of 10 kV 200  $\mu\text{A}$  and 30 kV 1000  $\mu\text{A}$  were carried out. Only data for Titanium (Ti) element that is commonly related to terrigenous siliciclastic components in the sediment (Richter et al., 2006) are reported in the present study.

130 | imaged, and visually described for identifying sedimentological facies. Core RHS-KS55 was then subsampled for benthic  
microfaunal analyses (i.e. ostracods and foraminifera) and clay mineralogy. Three-cm thick slides were collected using a  
10 cm sampling interval of 10 cm step through the core, except from the basebottom of the core to ca. 500 cm, where thick  
slides and sampling step were slightly modified. A total of 79 samples were ~~washed over~~sieved through a 63 µm ~~sieve~~mesh  
screen and the residues were dried and dry-sieved using a 125 and 150 µm mesh screens. Ostracods and benthic foraminifera  
were hand-sorted from the >125 and >150 µm fractions, respectively, and stored in Plummer slides. To illustrate the diversity  
of benthic meiofauna, total abundance (values normalized for a 100 cm<sup>3</sup> sample volume), species richness (*S*), Shannon  
index (*H*), and Evenness index (*E*) (Hayek and Buzas, 1997; Shannon, 1948) were calculated, as described in Murray (2006),  
for each level. To highlight vertical patterns in benthic meiofaunal communities, hierarchical clustering was also performed  
on the 79 samples and the 16 major species (i.e. occurring with more than 5% in at least one sample) by mean of the PAST<sup>®</sup>  
software (version 2.09, 2011; Hammer et al., 2001). Cluster analyses were based on the arcsinus values of the square root  
“*pi*”, where “*pi*” is the relative abundance (%) of the species *i* divided by 100. A tree diagram was constructed according to  
the Ward’s method based on the squared Euclidean distances.

Fraction inferior to 63 µm was used to perform clay minerals analyses. X-ray diffraction (XRD) on oriented mounts of ~~non-~~  
~~calcareous~~carbonate-free clay-sized (< 2 µm) particles was conducted to identify clay minerals with the PANalytical  
diffractometer, following the routine of the GEOPS Laboratory (Paris Sud University, France) (Liu et al., 2004b; Liu et al.,  
2008). Three XRD runs were carried out, following air-drying, ethylene–glycol solvation during 24 hours, and heating at  
490 °C during 2 hours. Position of the (001) series of basal reflections on the three XRD diagrams was used to identify clay  
minerals. Semi-quantitative estimates of peak areas of the basal reflections for the main clay mineral assemblages of illite  
(10 Å), smectite (including mixed-layers) (15–17 Å), and kaolinite/chlorite (7 Å) were performed on the glycolated curve  
using the MacDiff software (Petschick, 2000). Relative proportions of kaolinite and chlorite were determined using the ratio  
3.57/3.54 Å of the peak areas.

## 4. Results

### 4.1. Seismic stratigraphic framework, age model and sedimentation rates

Seismic discontinuities and seismic units described in the following section are based on Fanget et al. (2014). Several  
Deglacial and Holocene seismic units bounded by well-marked discontinuities are identified at the core site (Fig. 2).

Seismic data highlights that core RHS-KS55 goes through surface D500, and represents an expanded record of seismic units  
U500, U600, and U610. Seismic unit U620a is missing in the studied core (Fig. 2).

The age of seismic unit U500, that corresponds to the early Holocene transgressive parasequence (Fanget et al., 2014), is  
poorly constrained in core RHS-KS55. Considering the age of the underlying deposits of seismic unit U400 in this area (i.e.  
paleo-deltaic complex of the Rhone (ERDC), ca. 10.5 ka cal. BP, Berné et al., 2007), we assume that <sup>14</sup>C dates obtained in  
this unit are generally biased, because of reworking occurring in shallow water ~~environment. Only~~environments. This

160 interpretation is supported by the ~~uppermost part~~ nature of sediments that composed this unit ~~is confidently dated between ca. 9.2 and 8.3 ka cal. BP~~ (.)  
9. Indeed, at the regional scale, seismic unit U500 is made of tempestite deposits (Facies 1, section 4.2 and 8.3 ka cal. BP (.)  
which mainly contain infra-littoral (i.e. upper shoreface) benthic foraminifera (*Elphidium crispum*; see Table 2); ~~the~~ and  
Fanget et al., 2014). These benthic foraminifera are likely reworked by high energy hydrodynamic processes. The older ages  
165 obtained within seismic unit U500 are ~~possibly~~ ~~thus~~ ~~probably~~ the result of reworking during the transgression of an  
underlying Younger Dryas/Preboreal delta front. ~~(for more details, see section 5.1).~~  
~~Only the uppermost part of this unit is confidently dated between ca. 9.2 and 8.3 ka cal. BP (Table 2).~~ The upper boundary of  
seismic unit U500, called D600 and interpreted as a ~~Maximum Flooding Surface~~ MFS (MFS, Fanget et al., 2014),  
corresponds to a condensed ~~interval~~ section formed between ca. 8.3 and 4.5 ka cal. BP in the studied core (Fig. 3). It is  
characterized by very low sedimentation rate of ca. ~~0.01~~ cm yr<sup>-1</sup> (Fig. 4). Seismic unit U600 progrades on D600, and is  
170 related to the marine component of the St Ferréol ~~lobe~~ and Ulmet ~~lobe~~ lobes (Fanget et al., 2014). <sup>14</sup>C dates indicate that  
seismic unit U600 was deposited between ca. 4.5 and 0.9 ka cal. BP (Fig. 3). Sedimentation rates through this interval  
oscillated between 0.03 and 0.4 cm yr<sup>-1</sup> (Fig. 4). Highest sedimentation rates are recorded along the uppermost part of this  
unit (i.e. between 300 and 110 cm, Fig. 4). Finally, seismic unit U610, ~~which corresponds~~ ~~corresponding~~ to the activity of the  
Grand Passon and Bras de Fer channels, was formed between ca. 900 and 280 a cal. BP (Fig. 3) (Fanget et al., 2014). As  
175 seismic unit U620a is missing within core RHS-KS55, we estimate that the top of the core has an age of ca. 280 a cal. BP.  
Sedimentation rate through seismic unit U610 is estimated at ca. 0.11 cm yr<sup>-1</sup> (Fig. 4).

#### 4.2. Sedimentary features

Based on lithological description (including lithofacies, sedimentary structures, bioturbation and color) of core RHS-KS55  
(Fanget et al., 2014), three main sedimentary facies (i.e. Facies 1, 2 and 3 (including 3a and 3b)) are identified and  
180 summarized as follows:

Facies 1: From 738 (core bottom) to 460 cm, core RHS-KS55 consists of numerous silt or very fine sand laminae (in the  
sense of Campbell, 1967) interlaminated with grayish and beige silty clay with millimeters to several centimeters spacing  
(Fig. 4). Within these very thin laminae (mm to few cm-thick), which are characterized by erosional basal contacts, no  
sedimentary structures can be identified.

185 Facies 2: From 460 to 430 cm, a peculiar interval consisting of heterolithic content in a grayish silty clay matrix is observed  
(Fig. 4). *Turritella* sp., as well as several bivalves (e.g. *Acanthocardia echinata*, *Arca tetragona*, *Nucula* sp.) and bryozoans  
are identified.

Facies 3a: From 430 to 320 cm, sediment consists of beige silty clay without visible sedimentary structures. Diffuse veneers  
of yellowish lighter levels and spot of darker ~~sediments~~ ~~deposits~~ (richer in hydrotroilite), clearly obliterated by intense  
190 bioturbation, are observed (Fig. 4). Scattered bryozoans debris, *Turritella* sp., and bivalves are encountered in this interval.

Facies 3b: From 320 to 0 cm, sediment consists of grayish and beige silty clay and contains abundant hydrotroilites and  
bioturbation.

### 4.3. Clay mineralogy and XRF data

Clay mineral assemblages are dominantly composed of illite, with values ranging from ca. 55 to 85% (Fig. 5). Illite content exhibits high and quite constant values (ca. 70%) from the bottom of the core to 465 cm. From 455 to 360 cm, illite content decreases to ca. 60%. A strong increase is observed at 340 cm with values reaching ca. 80%. Illite content remains high between 340 and 110 cm. At 110 cm, illite content drops to ca. 55% and is generally lower from 100 to 30 cm. Along the uppermost 30 cm of the core, a progressive increase in illite content is identified. Smectite content is inversely correlated to illite content throughout core RHS-KS55 (Fig. 5). It has very low values (ca. 2.5%) from 738 to 465 cm, and exhibits higher (from ca. 5 to 25%) and erratic values along the uppermost 460 cm of the core. Chlorite content reaches ca. 20% in the lower part of the core (from the bottom to 350 cm), and drops near 0% between 350 and 120 cm (Fig. 5). Chlorite content increases to ca. 20% along the uppermost 120 cm of the core. Kaolinite content is very low throughout core RHS-KS55 with values close to 0% from the bottom of the core to 360 cm, and ranging from ca. 7 to 10% between 360 cm and the top of the core (Fig. 5).

~~Major changes in clay mineral assemblages occur simultaneously with changes in sedimentary facies (Fig. 5).~~

~~Measurements of the bulk intensity of Ti (Fig. 5) show erratic values from the bottom of the core to ca. 460 cm. Ti content increases progressively from ca. 460 to 400 cm and is characterized by high values between 400 and 20 cm. Within this interval, some little oscillations in Ti content are observed. From 20 cm to the top of the core, Ti content decreases strongly.~~

### 4.4. Ostracod fauna

#### 4.4.1. Ostracod density and diversity indices

The number of ostracods per sample varies greatly from 68 to 12 821 ind./100 cm<sup>3</sup> in core RHS-KS55 (Fig. 6). From the base of the core to 482 cm, density ranges from 68 to 1 266 ind./100 cm<sup>3</sup>. The lowest values are observed from 642 to 632 cm, whereas four peaks of 1 141, 1 243, 1 006, and 1 266 ind./100 cm<sup>3</sup> are identified at 702, 622, 571, and 541 cm, respectively. From 471 to 352 cm, the number of counted ostracods increases strongly with values reaching up to 12 821 ind./100 cm<sup>3</sup> and 10 539 ind./100 cm<sup>3</sup> at 432 and 412 cm, respectively. The number of ostracods per sample drops to 222 ind./100 cm<sup>3</sup> at 332 cm, and ranges from 305 to 1182 ind./100 cm<sup>3</sup> between 322 and 162 cm. Density decreases between 152 and 82 cm, and then increases progressively along the uppermost 82 cm of the core.

Species richness (*S*) oscillates between 7 and 31 species per sample through the core, and follows approximately the same trend that density (Fig. 6). Lowest values of *S* are recorded when ostracods abundances are minimal, i.e. at 642 and 632 cm, and between 152 and 82 cm. *S* is maximal within the interval comprising between 482 and 442 cm. The Shannon index (*H*) varies between 1.2 and 3.0 through the core (Fig. 6). *H* increases progressively from the base of the core to 492 cm. *H* reaches maximal values (ca. 3.0) between 482 and 442 cm, and decreases progressively from 433 to 82 cm. Along the uppermost 82 cm of the core, *H* gradually increases (from ca. 1.4 to 2.2). The Evenness index (*E*), which is comprised between 0.2 and 0.7, follows approximately the same trend that *H* (Fig. 4). The lowest values of *E* are observed from 738 to

225 492 cm, whereas the maximal values are observed from 482 to 422 cm. *E* is relatively constant along the uppermost 412 cm of the core, with values oscillating around 0.5.

#### 4.4.2. Cluster analysis

R-mode cluster analysis allows us to identify six ostracod clusters plus one single species when a cut-off level of 1.4 is applied (Figs. 7 and 8).

230 Cluster A is made of *Semicytherura incongruens*, *Pontocythere elongata*, and *Semicytherura* sp. It has a maximal contribution from 738 to 512 cm, with erratic values ranging from ca. 5 to 25%. It decreases strongly from 512 to 442 cm, and disappears completely along the uppermost 432 cm of the core.

Cluster B is composed of *Propontocypris pirifera*, *Cytherissa* sp., *Eucythere* sp., *Aurila* sp., and *Cytheridea neapolitana*. It shows a low contribution through the core, with values generally <10%. It increases only between 482 and 442 cm, where a  
235 maximal value of 25% is reached.

Cluster C is constituted by *Cytherella* sp., *Cytheropteron alatum*, *Cytheropteron monoceros*, and *Carinocythereis carinata*. It exhibits a low contribution (<10%) from 738 to 492 cm. It increases strongly between 492 and 372 cm, to reach up to ca. 40% of the ostracod fauna at 432 cm. Cluster C decreases progressively, and has a minimal contribution along the uppermost 362 cm of the core.

240 The single species corresponds to *Leptocythere* spp. This species dominates ostracod fauna from 738 to 492 cm, with values ranging from ca. 41 to 73%. Along the uppermost 492 cm of the core, *Leptocythere* spp. oscillates between low (<5%) and high (ca. 30-40%) values. The lowest contributions of this species are recorded from 472 to 432 cm, 332 to 302 cm, 232 to 182 cm, and 122 to 82 cm.

Cluster D is made of *Cytheropteron rotundatum* and *Krithe* spp. (juvenile *Krithe* and *K. pernoides*). From 738 to 362 cm, it  
245 has a ~~minimal~~low contribution (<5%). It increases strongly along the uppermost 352 cm of the core, with values ranging from ca. 30 to 60%, and reaches a peak of ca. 77% at 92 and 82 cm.

Cluster E is composed of *Argilloecia* spp., *Loxoconcha laevis*, and *Paradoxostoma* sp. It exhibits a moderate contribution through the core, with values oscillating generally between ca. 5 and 15%. However, four peaks of ca. 37, 45, 35, and 27% are recorded at 492, 342-332, 112, and 72 cm, respectively.

250 Cluster F is constituted by *Sagmatocythere* sp., *Bosquetina dentata*, and *Pterigocythereis jonesii*. It shows a minimal contribution (<5%) from 738 to 492 cm. It increases between 482 and 162 cm, with values ranging from ca. 20 to 35%, except between 352 and 332 cm, where a decrease (<15%) is observed. From 162 to 72 cm, Cluster F exhibits erratic values oscillating between ca. 2 and 20%. Along the uppermost 72 cm of the core, it increases slightly.

#### 4.5. Benthic foraminiferal fauna

255 4.5.1. Benthic foraminiferal density and diversity indices



The number of benthic foraminifera per sample varies greatly from 404 to 74 642 ind./100 cm<sup>3</sup> through the core (Fig. 6). From 738 to 482 cm, density shows erratic values oscillating between 404 and 7 130 ind./100 cm<sup>3</sup>, and increases progressively. The number of counted specimens increases strongly between 472 and 382 cm, with values ranging from 12 386 to 74 642 ind./100 cm<sup>3</sup>. From 382 to 352 cm, density decreases rapidly, and drops to 2 995 ind./100 cm<sup>3</sup>. Along the uppermost 342 cm of the core, benthic foraminiferal densities remain quite constant and below 3 000 ind./100 cm<sup>3</sup>. Species richness (*S*) oscillates between 13 and 49 species per sample through the core (Fig. 6). The lowest values of *S* (from 13 to 26) are recorded from 738 to 632 cm. *S* increases from 622 to 492 cm, except between 542 and 532 cm where a decreased is observed. The highest values of *S* are encountered from 482 to 212 cm, with values oscillating between 34 and 49 species per sample. *S* slightly decreases along the uppermost 202 cm of the core and remains quite constant. The Shannon index (*H*) varies between 1.2 and 3.2 through the core RHS-KS55 (Fig. 6). From 738 to 642 cm, *H* decreases progressively from 2.3 to 1.2. Erratic values, oscillating between 1.6 and 2.7, are observed from 632 to 492 cm. Even if *H* slightly decreased between 452 and 402cm, the highest values are recorded between 482 and 352 cm. From 342 to 132 cm, *H* decreases progressively, whereas it increases slightly along the uppermost 122 cm of the core. The Evenness index (*E*) exhibits relatively low values through the core, ranging from 0.2 to 0.5, and follows exactly the same trend that *H* (Fig. 6).

#### 270 4.5.2. Cluster analysis

R-mode cluster analysis allows us to distinguish four benthic foraminiferal clusters when a cut-off level of 2.4 is applied (Figs. 7 and 9).

Cluster 1 is composed of *Elphidium* spp. (including *E. advenum*, *E. crispum*, *E. decipiens*, *E. granosum*, *E. incertum*, *E. macellum*, and *E. margaritaceum*), *Nonionella turgida*, and *Quinqueloculina lata*. From 738 to 492 cm, Cluster 1 dominates strongly with abundances oscillating between ca. 58 and 91%. The contribution of Cluster 1 drops to ca. 15% at 472 cm. It has a minimal contribution along the uppermost 472 cm of the core, and especially between 342 and 62 cm, where it exhibits values <10%.

Cluster 2 is constituted by *Cassidulina carinata*, *Bulimina marginata*, and *Valvulineria bradyana*. It is characterized by a low contribution (less than 10%) from 738 to 492 cm. It increases progressively from ca. 15 to 72% between 482 and 202 cm, and remains quite constant along the uppermost 192 cm of the core, with values oscillating between ca. 50 and 72%.

Cluster 3 is made of *Haynesina depressula*, *Ammonia beccarii*, and *Eggerella scabra*. It has a low contribution (<15%) through the core RHS-KS55. From 738 to 492 cm, it exhibits relatively erratic values, and three peaks of ca. 12, 5, and 6% are observed at 699, 632, and 532 cm, respectively. Cluster 3 has a minimal contribution (<1%) between 482 and 342 cm, and increases slightly from 332 to 162 cm. From 162 to 82 cm, it increases progressively to reach a value of ca. 9%. Cluster 3 decreases again between 82 and 32 cm, and increases slightly along the uppermost 32 cm of the core.

Cluster 4 is constituted by *Pseudoeponides falsobeccarii*, *Textularia agglutinans*, *Hyalinea balthica*, *Melonis barleeanus*, *Bulimina aculeata*, *Sigmoilopsis schlumbergeri*, and *Cibicides lobatulus*. It shows a low contribution from 738 to 492 cm, with erratic values ranging from ca. 5 to 22%. It increases strongly between 482 and 402 cm, where values of ca. 55% are reached. From 402 to 292 cm, Cluster 4 decreases progressively. It remains quite constant along the uppermost 292 cm of the core, with values oscillating between ca. 13 and 25%.

## 5. Discussion

### 5.1. Benthic meiofauna reworking processes in subaqueous deltaic environment

In subaqueous deltaic environments, reworking processes appear to be common within transgressive deposits (Cattaneo and Steel, 2003). In the Rhone subaqueous delta, transgressive deposits consist of tempestite deposits (seismic unit U500) which are the result of regular occurrence of high energy hydrodynamic processes (including combined storm and flood events; Fanget et al., 2014). These processes regularly winnowed the seafloor and generate erosion, reworking and transport of sediments. Thus, it is likely that benthic calcareous meiofauna are reworked from older deposits into modern deposits having the same faunal assemblages (Cearreta and Murray, 2000). These reworked benthic meiofauna cannot be considered as *in situ*, but it appears impossible to distinct them from the unreworked modern tests and carapaces. It will directly affect AMS dating with measured ages older than true ages, as observed within the transgressive seismic unit U500. Such phenomena have been observed in Denmark (Heier-Nielsen et al., 1995) and in Spain (Cearreta and Murray, 2000), and highlight the difficulty to obtain reliable AMS dates from high energy transgressive deposits.

Within the recent most prograding units of the Highstand Systems Tract (4.5 to 0.3 ka cal. BP in the present study), we also observe the regular occurrence of reworking and transport of benthic meiofauna. Reworking processes are regularly encountered in shallow-water environments (e.g. Frenzel and Boomer, 2005; Loureiro et al., 2009; Fanget et al., 2013a). Conversely to the Transgressive Systems Tract, reworked benthic meiofauna are easier to identify since they originate from shallow-water environments and deposit into deeper settings. Reworking processes in AMS dating are thus considered as less important and problematic in Highstand Systems Tract. It is likely than these allochthonous benthic meiofauna are transported and redeposited further offshore within the river plume during periods of increased river discharge (Fanget et al., 2013a). Thus, it can be relevant to use allochthonous meiofauna as bio-markers for better understanding transport and reworking processes (Cronin, 1983; van Harten, 1986; Zhou and Zhao, 1999; Fanget et al., 2013a; Angue Minto'o et al., 2015), and study paleo-hydrology. The distribution pattern of reworked benthic meiofauna through highstand deposits is likely to reflect hydrological fluctuations in the past (see section 5.3.).

### 5.2. Record of Holocene sea-level rise and Rhone delta evolution

Seismic stratigraphy, sedimentological (including clay minerals) and benthic meiofauna data described in the previous section allow the sub-division of the studied core into three main intervals. These intervals fairly match the tripartite sub-

division of the Holocene (Walker et al., 2012; Wanner et al., 2014), and ~~are closely~~ might be linked to the Holocene sea-level history, and to the Rhone deltaic system evolution.

#### **5.4.2.1. Interval 1 (ca. 10.5-8.3 ka cal. BP)**

This interval encompasses most of the early Holocene. The age of the bottom of the core up to ca. 460 cm cannot be dated precisely because it corresponds to a transgressive parasequence (seismic unit U500, Fig. 2), that formed in a context of shallow-marine environment. Based on the age of the underlying deposits (i.e. the ERDC, seismic unit U400) and on <sup>14</sup>C dates, this interval was deposited between ca. 10.5 and 8.3 ka cal. BP (i.e. the early Holocene; Walker et al., 2012).

Tempestite (storm-induced) deposits, which are commonly ~~formed~~ found in lower to middle shoreface environments during periods of storm decelerating flows (Myrow, 1992; Myrow and Southard, 1996; Pérez-López and Pérez-Valera, 2012), characterize this interval (Fig. 4). The intercalation of fine clay and silt layers ~~(corresponding to strong variations in Ti content, Fig. 5)~~ suggests that these deposits are distal tempestites (i.e. turbidite-like deposited below the storm wave base;

Myrow, 1992; Pérez-López and Pérez-Valera, 2012). This facies is interpreted to correspond to an hydrodynamic regime resulting from the combination of E-SE storm waves and flood events (i.e. 'wet storms' of Guillén et al., 2006), which regularly winnow the seafloor (Fanget et al., 2014). Tempestite deposits mainly contain foraminifera belonging to Cluster 1 (*Elphidium* spp., *N. turgida*, *Q. lata*), and ostracods belonging to Cluster A (*S. incongruens*, *P. elongata*, *Semicytherura* sp.), and to the genus *Leptocythere* (Figs. 8 and 9). Benthic foraminiferal species, like *N. turgida*, are typical of shallow prodeltaic environment enriched in organic matter of continental origin (e.g. Barmawidjaja et al., 1992; De Rijk et al., 2000; Diz and Francés, 2008; Van der Zwaan and Jorissen, 1991). *Elphidium* spp. and *Q. lata* are commonly reported in sandy silty substrates subject to strong hydrodynamic processes (e.g. Donnici and Serandrei Barbero, 2002; Jorissen, 1988; Rossi and Vaiani, 2008; Sgarrella and Moncharmont Zei, 1993). Similar observations are described in the modern Rhone subaqueous delta (Goineau et al., 2011; Goineau et al., 2015; Mojtahid et al., 2009). Similarly, ostracods content of Cluster A are represented by littoral to sublittoral/phytal marine forms (e.g. Bonaduce et al., 1975; Cabral et al., 2006; Carbonel, 1980; Peypouquet and Nachite, 1984; Zaïbi et al., 2012). The genus *Leptocythere* is commonly found in brackish and shallow water environments, and many *Leptocythere* are known to be euryhaline species (e.g. Anadon et al., 2002; Boomer and Eisenhauer, 2002; Carbonel, 1973, 1980; Frenzel and Boomer, 2005; Gliozzi et al., 2005; Van Morkhoven, 1963).

According to paleoenvironmental reconstruction based on benthic meiofauna from core RHS-KS55, the early Holocene is characterized, in the Rhone subaqueous delta, by high energy hydrodynamic processes and significant organic matter input of continental origin typical of shallow infra-littoral setting. This interpretation is in agreement with the occurrence of tempestite deposits, and the global estimates of sea-level rise during the early Holocene (e.g. Bard et al., 1996; Fairbanks, 1989; Smith et al., 2011). Based on the sea-level curve of Stanford et al. (2011), the base of the core (estimated at ca. 10.5 ka cal. BP) corresponds to a sea level of ca. 50 m below its present-day position. Due to the location of core RHS-KS55 at a water depth of 67 m and its length of 7.38 m, a paleo-water depth of ca. 24 m can be estimated at the base of the core (subsidence and compaction being considered as negligible). At the top of the tempestite facies (i.e. at ca. 460 cm), which is

dated at ca. 9.2 ka cal. BP, a paleo-water depth of ca. 52 m is estimated. Thus, the resulting rate of sea-level rise within this interval (738-460 cm) is ca. 20 mm yr<sup>-1</sup>. This value matches the one found by Stanford et al. (2011) for the early Holocene. Thus, we consider that tempestite deposits, preserved within this transgressive interval (seismic unit U500), are formed at water depth ranging from ca. 20 to 50 m. In the Rhone subaqueous delta, we consider the tempestite facies as a relatively good paleo-bathymetric marker and we have been able to correlate it over a large prodelta area (see core RHS-KS40, RHS-KS22, and RHS-KS39 in Fanget et al. (2014)).

#### **5.12.2. Interval 2 (ca. 8.3-4.5 ka cal. BP)**

The interval comprised between 460 and 430 cm corresponds to a period ranging from ca. 8.3 to 4.5 ka cal. BP (i.e. the middle Holocene, Fig. 3), when the Rhone outlet(s) was situated 10 to 30 km landward from the modern shoreline. Considering the resolution of our seismic data (in the order of ca. 0.5 m), it corresponds to the position of the MFS (surface D600, Fig. 2) that marks the transition between retrogradation and progradation. Very low sediment accumulation (ca. 0.01 cm yr<sup>-1</sup>, Fig., 4), abundant shell concentration, and very rich microfossil content (up to ~13 000 ostracods/100 cm<sup>3</sup> and ~75 000 foraminifera/100 cm<sup>3</sup>, Fig. 6) indicate sediment starvation ~~and condensation~~ within this ~~interval~~ condensed section which separates transgressive (below) from regressive (above) deposits. It consists in a silty clay matrix incorporating coarse-grained sediments with reworked shoreface material and shell hash. Clay mineralogy assemblages indicate a clear change in clay mineralogy proportions with a significant decrease in illite content (from 80 to 60%) and a sharp increase in smectite content (from 0 to 20%; Fig. 5). Benthic foraminifera belonging to Cluster 4 (*P. falsobeccarii*, *T. agglutinans*, *H. balthica*, *M. barleeanus*, *B. aculeata*, *S. schlumbergeri*, *C. lobatulus*), and ostracods belonging to Cluster B (*P. pirifera*, *Cytherissa* sp., *Eucythere* sp., *Aurila* sp., and *C. neapolitana*), Cluster C (*Cytherella* sp., *C. alatum*, *C. monoceros*, and *C. carinata*), and Cluster F (*Sagmatocythere* sp., *B. dentata*, and *P. jonesii*) are dominant within this interval (Figs. 8 and 9). Except for *C. lobatulus* which is preferentially found in high energy shallow-water setting (e.g. Bartels-Jónsdóttir et al., 2006; Javaux and Scott, 2003; Milker et al., 2011; Murray, 2006), foraminifera assemblage is mainly composed of species thriving under stable environment characterized by marine-derived organic matter ~~suppliesinput~~ and well-oxygenated sediments (e.g. De Rijk et al., 2000; Debenay and Redois, 1997; Fontanier et al., 2008; Goineau, 2011; Goineau et al., 2011; Goineau et al., 2015; Mendes et al., 2004; Mojtabid et al., 2009). Clusters B and F are mainly composed of shallow infra-littoral ostracods (e.g. Bonaduce et al., 1975; Frenzel and Boomer, 2005; Guernet et al., 2003; Ruiz et al., 1997; Zaïbi et al., 2012), whereas Cluster C is primarily made of circa-littoral and epi-bathyal species (e.g. Bonaduce et al., 1975; El Hmaidi et al., 2010; Yamaguchi and Norris, 2012).

The middle Holocene condensed section is very well identified thanks to benthic microfossils indicating mixed assemblages belonging to diverse environments, from infra-littoral to epi-bathyal settings. Shallow-water species highlight incorporation of the previous shoreface and delta mouth sediments that were left in situ during the transgressive submersion. Circa-littoral and epi-bathyal species indicate abrupt increase of water depth (peak of transgression), and mark the time of maximum landward shift of the shoreline.

### 5.4.2.3. Interval 3 (ca. 4.5-0.3 ka cal. BP)

The recentmost interval (from 430 cm to the top of core) corresponds to seismic units U600 and U610 (Fig. 2), that formed during the late Holocene a series of regressive deltaic lobes, that make up the Highstand Systems Tract in the sequence stratigraphic terminology. They consist in fine-grained prodeltaic deposits, and are related to the activity of the St Ferréol and Ulmet distributaries (seismic unit U600), and to the synchronous, then successive, activity of the Grand Passon and Bras de Fer Channels (seismic unit U610) (Fanget et al., 2014). At the core site, clay minerals are dominated by illite, as elsewhere in the Rhone prodelta (Chamley, 1971). Indeed, the Rhone River, receiving principally its detrital material from the Alps, is particularly rich in illite, associated with some chlorite (Chamley, 1971) that tends to be trapped in sandy sediments during deposition (Chamley, 1971; Giresse et al., 2004). Both minerals represent the relative contribution of physical weathering to sedimentation, since they are resistant to degradation and transport (Chamley, 1971). Relative contents of illite are changing simultaneously with changes in sedimentary facies and activity of different distributaries (Fig. 5). Smectite ~~contents are~~ content is low as a whole but higher than within underlying intervals, when sea level was lower. The onset of seaward progradation of the Rhone deltaic lobes corresponds, by definition, to the age of deposits situated immediately above the [MFS-condensed section](#). This age is ca. 4.5 ka cal. BP according to the age model. It corresponds to a marked increase of smectite content. It also corresponds to a marked increase in benthic foraminifera belonging to Cluster 2 (*C. carinata*, *B. marginata*, and *V. bradyana*) and ostracods belonging to cluster D (*C. rotundatum* and *Krithe* spp.) (Figs. 8 and 9). Foraminifera assemblage is constituted by typical species living in the distal part of the Rhone prodelta, with fine-grained sediments enriched in both terrestrial and marine organic matter (Goineau et al., 2011; Goineau et al., 2015; Kruit, 1955; Mojtabid et al., 2009). They are also reported as opportunistic species ~~able to~~ which respond quickly to fresh phytodetritus input by ~~increased~~ higher reproduction (De Rijk et al., 2000; Fontanier et al., 2003; Goineau et al., 2011; Jorissen, 1987). Ostracods content of Cluster D is known as common assemblage of circa-littoral to epi-bathyal environments (Bonaduce et al., 1975; Coles et al., 1994; Cronin et al., 1999; Didié et al., 2002; Yamaguchi and Norris, 2012). In the Rhone subaqueous delta, we hypothesize that these species can be tolerant to moderate river influence (Fanget et al., 2013b). At the core site, strong decreases of Cluster 1 and Cluster B (shallow infra-littoral species), and increases of Cluster 2 and Cluster D reveal the establishment of prodeltaic conditions since 4.5 ka cal. BP (Figs 8 and 9). More precisely, they correspond to the progradation of the St Ferréol and Ulmet lobes. A similar pattern is identified on boreholes in the Rhone delta plain, where the onset of prodeltaic sedimentation is marked by the dominance of *V. bradyana* around 4 ka cal. BP (Amorosi et al., 2013).

Within Interval 3, we note also the presence of benthic foraminifera belonging to Cluster 3 (*H. depressula*, *A. beccarii*, *E. scabra*), and ostracods belonging to the genus *Leptocythere* and to Cluster E and F (Figs. 8 and 9). The vertical pattern of these ostracods in this interval will be discussed in further details in the next section (5.4.3). Foraminifera constituting Cluster 3 are typical of very shallow-water environments, and *E. scabra* is notably known to be adapted to thrive in organic matter-enriched and hypoxic sediments (Diz and Francés, 2008; Donnici and Serandrei Barbero, 2002; Jorissen, 1987; Mendes et

al., 2004). This assemblage increases in the uppermost 300 cm of the core, in concomitance with increased hydrotroilite content. Autigenic minerals generated by sulfate reduction (hydrotroilite) can be related both to high sedimentation rate (as observed in the core), leading to reducing conditions, and high organic matter ~~input~~<sup>supply</sup>. These observations suggest increased river influence that can be linked to the progressive progradation of Rhone delta, and to the beginning of ~~activity~~ of the Bras de Fer and Grand Passon Channels <sup>activity</sup>, located in front of the studied core.

### 5.2.3. Record of Holocene Cold Events (CRs)

Ostracods belonging to Cluster E and Cluster F, and especially to the genus *Leptocythere* show well-marked peaks within highstand prodeltaic deposits (Fig. 8). As previously described, the genus *Leptocythere* is widely distributed in brackish and shallow marine water environments (Anadon et al., 2002; Boomer and Eisenhauer, 2002; Carbonel, 1973, 1980; Frenzel and Boomer, 2005; Gliozzi et al., 2005; Van Morkhoven, 1963). In the Po delta, the occurrence of *Leptocythere* sp. is notably related to local increase of fluvial influence (Rossi, 2009), and in the Rhone delta, few valves of *Leptocythere* are encountered in restricted environmental areas characterized by estuarine conditions (Amorosi et al., 2013). Thus, the distribution pattern of *Leptocythere* through the highstand deposits would reflect hydrological fluctuations. During the Holocene, high fluctuations in precipitations are recorded, notably during the CRs (Mayewski et al., 2004; Wanner et al., 2014). In Europe, these CRs (or at least CR0, i.e. the 8.2 ka event, and CR6, i.e. the LIA) are characterized by intensified rainfalls (Arnaud et al., 2012; Magny et al., 2010; Magny and Begeot, 2004).

Two intervals of increased occurrence of *Leptocythere* (and therefore increased rainfall) are identified between ca. 400 and 350 cm, and ca. 70 and 0 cm (Fig. 8). They correspond to ages comprising between ca 4.0 and 2.2 ka cal BP and 0.6 and 0.2 ka cal. BP, respectively. These intervals are close to CR4 and CR6 (i.e. the LIA) that are dated between ca. 3.1 and 2.8 ka cal. BP and ca. 0.65 and 0.45 ka cal. BP, respectively (Wanner et al., 2014). ~~The hypothesis~~<sup>Hypothesis</sup> of increased rainfall and river runoff, in the Rhone watershed, during the cooler late Holocene is supported, at least for the LIA, by observed advance of the Rhone Glacier (Goehring et al., 2011), high level ~~of~~<sup>in</sup> the Bourget Lake (France) (Arnaud et al., 2012), higher soil erosions in the French Pre-Alps (Simonneau et al., 2013), increased detritism in the Rhone delta plain (Bruneton et al., 2001; Provansal et al., 2003), and increased Rhone River floods (Pichard, 1995). In contrast, CR5, the so-called Migration Period Cooling, is not characterized by any increase in *Leptocythere*, suggesting dryer conditions in the Rhone watershed, compared to CR4 and CR6.

The signature of CR0 (the 8.2 ka event), CR1, CR2, and ~~RCC3~~<sup>CR3</sup>, is difficult to discriminate since they are incorporated within a condensed ~~interval~~<sup>section</sup> with very low accumulation rate (~~Figs~~<sup>Fig.</sup> 8).

On the other hand, we also notice that two other periods of increased *Leptocythere* are recorded between ca. 300 and 230 cm and between ca. 180 and 120 cm, i.e. between ca. 1.4 and 1.3 ka cal. BP and ca. 1.2 and 1.0 ka cal. BP (Fig. 8). These periods are not related to global events (CR-like), but might correlate to periods of regional climate deterioration as attested by high level of the Bourget lake (Arnaud et al., 2012), and by periods of increased detritism in the Rhone delta plain (Provansal et al., 2003).

Conversely, a strong decrease in *Leptocythere* is observed from 120 to 80 cm (Fig. 8). It suggests dryer conditions during this interval which corresponds to the Medieval Climate Anomaly (ca. 950-1250 AD). In the Northern Hemisphere, the MCA is generally described as a warm period characterized by intense dryness. In the Mediterranean, several studies highlighted dryer conditions during this event (e.g. Wassenburg et al., 2013; Martinez-Ruiz et al., 2015; Bassetti et al., 2016). The same signature is also observed in the Alps and the Rhone watershed, with periods of low lake level and low flood frequency, respectively (e.g. Magny, 2004; Wilhelm et al., 2016). Thus, the hypothesis of increased drought at the studied site during the MCA fits well with regional and local observation.

Within the late Holocene interval, the distribution pattern of Cluster E is slightly offset of the single species *Leptocythere* (Fig. 8). This Cluster is constituted by the shallow infra-littoral *Paradoxostoma* and *Loxoconcha* species (Bonaduce et al., 1975; El Hmaidi et al., 2010), and by the epi-bathyal *Argilloecia* species. *Argilloecia* sp., in the Rhone subaqueous delta, appears to be tolerant to fluvial influence and respond potentially to organic matter supply (Fanget et al., 2013b). Nevertheless, increased of Cluster E is not recorded within the periods characterized by higher river supply such as the CR4 and CR6 (i.e. the LIA), but slightly after these periods. It possibly indicates that *Leptocythere* is a better competitor during periods of increased detritism and fluvial discharge.

## 6. Conclusion

Our study shows that some environmental and sea-level changes during the Holocene can be clearly depicted from sedimentological and benthic meiofauna proxies.

During the early Holocene (11.7 to 7-8 ka cal. BP), sea-level rise is led to the deposition of tempestite sediments that contain shallow infra-littoral benthic meiofauna. These deposits are thought to be formed between ca. 20 and 50 m water depth, and we believe that this feature can be used as a good regional scale paleobathymetric marker.

The middle Holocene (7-8 to 4-5 ka cal. BP) corresponds to a phase of very low sedimentation at the core site, resulting in the formation of a condensed ~~interval~~section (i.e. the Maximum Flooding Surface in a sequence stratigraphic terminology) reflecting the further landward position of the shoreline and Rhone outlet(s). This ~~MFS~~condensed section contains reworked shoreface material within a fine-grained matrix. It displays mixed faunal assemblages, ranging from infra-littoral to epi-bathyal environments, which are the result of erosion processes that occurred during the period of transgressive submersion and, then, mark the peak of transgression and the subsequent sediment starvation.

Following the transgressive maximum, the late Holocene (4-5 ka cal. BP to 19<sup>th</sup> century AD) sediment deposits are influenced by a combination of allocyclic and autocyclic factors. The progressive shoreline progradation and prodeltaic lobes switching are characterized by changes in clay mineralogy content, by the setting up of benthic meiofauna adapted to thrive

in the distal part of the Rhone River influence (i.e. distal St Ferréol and Ulmet lobes), and by the presence of very shallow-water species (i.e. proximal Grand Passon and Bras de Fer lobes).

Within the late Holocene deposits, ostracod assemblages emphasize fluctuations in the Rhone River hydrological activity. In particular, the occurrence of the ostracod genus *Leptocythere* highlights periods of increased fluvial discharge. These periods of intensified runoffs can be attributed to the 2.8 ka event (CR4) and the Little Ice Age (CR6) that are known to be at the origin of regional climate deterioration in Western Europe, as well as periods of regional climate deterioration at ca. 1.3 and 1.1 ka cal. BP. In contrast, the signature of the early and middle Holocene cold relapses are difficult to explore in the Rhone subaqueous delta since they correspond respectively to (a) a phase of rapid sea-level rise at the origin of shoreline reworking and deposition of tempestite, and (b) a period of very low sedimentation at the core site resulting in a condensed interval with low temporal resolution.

Finally, our study demonstrates that prodeltas may provide interesting expanded archives of climate changes at the land/sea interface, with accumulation rates reaching 0.4 m yr<sup>-1</sup>. On the other hand, such resolution can be achieved at one single site for only short time-intervals, since depot-centers migrate rapidly ~~in response to~~ [as a consequence of](#) sea-level changes, high sediment fluxes and lateral shifting of deltas lobes. This highlights the need of acquiring series of long cores/boreholes, parallel and orthogonal to deltaic systems.

## Acknowledgments

Core RHS-KS55 was collected during the RHOSOS cruise (2008) on board R/V *Le Suroît*. We thank the captain and crew of this cruise together with the Genavir technical staff as well as the scientific parties. Special thanks are due to Bernard Dennielou (IFREMER, Brest), for his commitment at sea and during the processing of the data in the laboratory. We thank the *Laboratoire de Mesure du Carbone 14*, UMS 2572, ARTEMIS in Saclay for 14C measurements by SMA in the frame of the National Service to CEA, CNRS, IRD, IRSN and *Ministère de la Culture et de la Communication*. This work was partly supported by the CNRS-INSU “Mistrals-Paleomex”. We are grateful to Bertil Hebert (CEFREM, University of Perpignan), and Gilbert Floch, Angélique Roubi and Mickaël Rovere (IFREMER, Brest) for their technical support. [We would like to thank A. Amorosi and L. Goisan for their comments and suggestions that helped to improve the manuscript. S. Luening is also thanked for commenting on the manuscript during the open discussion.](#)

## References

Alley, R. B., Mayewski, P. A., Sowers, T., Stuiver, M., Taylor, K. C., and Clark, P. U.: Holocene climatic instability: A prominent, widespread event 8200 yr ago, *Geology*, 25, 483-486, 1997.

Aloisi, J. C., Auffret, G. A., Auffret, J. P., Barusseau, J. P., Hommeril, P., Larsonneur, C., and Monaco, A.: Essai de modélisation de la sédimentation actuelle sur les plateaux continentaux français, *Bull. Soc. géol. France*, 19, 183-195, 1977.



- Amorosi, A., Dinelli, E., Rossi, V., Vaiani, S. C., and Sacchetto, M.: Late Quaternary palaeoenvironmental evolution of the Adriatic coastal plain and the onset of Po River Delta, *Palaeogeography, Palaeoclimatology, Palaeoecology*, 268, 80-90, 2008.
- 515 Amorosi, A., Rossi, V., and Vella, C.: Stepwise post-glacial transgression in the Rhône Delta area as revealed by high-resolution core data, *Palaeogeography, Palaeoclimatology, Palaeoecology*, 374, 314-326, 2013.
- Anadon, P., Gliozzi, E., and Mazzini, I.: Paleoenvironmental reconstruction of marginal marine environments from combined paleological and geochemical analyses on ostracods. In: *The Ostracoda: Applications in Quaternary Research*, Holmes, J. A. and Chivas, A. R. (Eds.), American geophysical Union, Washington, DC, 2002.
- 520 [Angue Minto'o, C.M., Bassetti, M.A., Morigi, C., Ducassou, E., Toucanne, S., Jouet, G., and Mudler, T.: Levantine intermediate water hydrodynamic and bottom water ventilation in the northern Tyrrhenian Sea over the past 56,000 years: new insights from benthic foraminifera and ostracods, \*Quaternary International\*, 357, 295-313, 2015.](#)
- Arnaud-Fassetta, G.: Dynamiques fluviales holocènes dans le delta du Rhône, 1998.PhD, UFR des Sciences Géographiques, Université de Provence, Aix en Provence, 329 pp., 1998.
- 525 Arnaud-Fassetta, G.: Geomorphological records of a flood-dominated regime in the Rhône delta (France) between the 1st century and the 2nd century AD. What correlations with the catchment paleohydrology?, *Geodinamica Acta*, 15, 79-92, 2002.
- Arnaud, F., Révillon, S., Debret, M., Revel, M., Chapron, E., Jacob, J., Giguet-Covex, C., Poulenard, J., and Magny, M.: Lake Bourget regional erosion patterns reconstruction reveals Holocene NW European Alps soil evolution and paleohydrology, *Quaternary Science Reviews*, 51, 81-92, 2012.
- 530 Barber, D. C., Dyke, A., Hillaire-Marcel, C., Jennings, A. E., Andrews, J. T., Kerwin, M. W., Bilodeau, G., McNeely, R., Southon, J., Morehead, M. D., and Gagnon, J. M.: Forcing of the cold event of 8,200 years ago by catastrophic drainage of Laurentide lakes, *Nature*, 400, 344-348, 1999.
- Bard, E., Hamelin, B., Arnold, M., Montaggioni, L., Cabioch, G., Faure, G., and Rougerie, F.: Deglacial sea-level record from Tahiti corals and the timing of global meltwater discharge, *Nature*, 382, 241-244, 1996.
- 535 Barmawidjaja, D. M., Jorissen, F. J., Puskarić, S., and van der Zwaan, G. J.: Microhabitat selection by benthic Foraminifera in the northern Adriatic Sea, *The Journal of Foraminiferal Research*, 22, 297-317, 1992.
- Bartels-Jónsdóttir, H. B., Knudsen, K. L., Abrantes, F., Lebreiro, S., and Eiríksson, J.: Climate variability during the last 2000 years in the Tagus Prodelta, western Iberian Margin: Benthic foraminifera and stable isotopes, *Marine Micropaleontology*, 59, 83-103, 2006.
- 540 Bassetti, M. A., Berné, S., Jouet, G., Taviani, M., Dennielou, B., Flores, J. A., Gaillot, A., Gelfort, R., Lafuerza, S., and Sultan, N.: The 100-ka and rapid sea level changes recorded by prograding shelf sand bodies in the Gulf of Lions (western Mediterranean Sea), *Geochem. Geophys. Geosyst.*, 9, Q11R05, 2008.

Bassetti, M. A., Berné, S., Sicre, M. A., Dennielou, B., Alonso, Y., Buscail, R., Jalali, B., Hebert, B., and Menniti, C.:  
 545 Holocene hydrological changes of the Rhone River (NW Mediterranean) as recorded in the marine mud belt, *Clim. Past Discuss.*, 2016, 1-31, 2016.

Berné, S., Jouet, G., Bassetti, M. A., Dennielou, B., and Taviani, M.: Late Glacial to Preboreal sea-level rise recorded by the  
 Rhone deltaic system (NW Mediterranean), *Marine Geology*, 245, 65-88, 2007.

Bhattacharya, J. P. and Giosan, L.: Wave-influenced deltas: geomorphological implications for facies reconstruction,  
 550 *Sedimentology*, 50, 187-210, 2003.

Blaauw, M.: Methods and code for 'classical' age-modelling of radiocarbon sequences, *Quaternary Geochronology*, 5, 512-  
 518, 2010.

Bonaduce, G., Ciampo, G., and Masoli, M.: Distribution of Ostracoda in the Adriatic Sea, *Pubbl. Staz. Zool. Napoli*, 40, 1-  
 148, 1975.

555 Boomer, I. and Eisenhauer, G.: Ostracod faunas as paleoenvironmental indicators in marginal marine environments. In: *The Ostracoda: Applications in quaternary Research*, Holmes, J. A. and Chivas, A. R. (Eds.), American Geophysical Union, Washington, DC, 2002.

Boyer, J., Duvail, C., Le Strat, P., Gensous, B., and Tesson, M.: High resolution stratigraphy and evolution of the Rhone  
 delta plain during Postglacial time, from subsurface drilling data bank, *Marine Geology*, 222-223, 267, 2005.

560 Bruneton, H., Arnaud-Fassetta, G., Provansal, M., and Sistach, D.: Geomorphological evidence for fluvial change during the Roman period in the lower Rhone valley (southern France), *CATENA*, 45, 287-312, 2001.

Cabral, M. C., Freitas, M. C., Andrade, C., and Cruces, A.: Coastal evolution and Holocene ostracods in Melides lagoon (SW Portugal), *Marine Micropaleontology*, 60, 181-204, 2006.

Campbell, C. V.: Lamina, laminaset, bed and bedset, *Sedimentology*, 8, 7-26, 1967.

565 Carbonel, P.: Les ensembles fauniques d'Ostracodes récents de l'Estuaire de la Gironde, *Bulletin de l'Institut de Géologie du Bassin d'Aquitaine*, 14, 75-81, 1973.

Carbonel, P.: Les ostracodes et leur intérêt dans la définition des écosystèmes estuariens et de la plateforme continentale. *Essais d'application à des domaines anciens, Mémoire de l'Institut de Géologie du Bassin d'Aquitaine*, 11, 350 pp., 1980.

Cattaneo, A., Correggiari, A., Langone, L., and Trincardi, F.: The late-Holocene Gargano subaqueous delta, Adriatic shelf:  
 570 Sediment pathways and supply fluctuations, *Marine Geology*, 193, 61-91, 2003.

[Cattaneo, A. and Steel, R.J.: Transgressive deposits: a review of their variability, \*Earth Science Reviews\*, 62, 3-4, 187-228, 2003.](#)

[Cearreta, A. and Murray, J.W.: AMS <sup>14</sup>C dating of Holocene estuarine deposits: consequences of high-energy and reworked foraminifera, \*The Holocene\*, 10, 1, 155-159, 2000.](#)

575 Chambers, F. M., Mauquoy, D., Brain, S. A., Blaauw, M., and Daniell, J. R. G.: Globally synchronous climate change 2800 years ago: Proxy data from peat in South America, *Earth and Planetary Science Letters*, 253, 439-444, 2007.

Chamley, H.: *Recherches sur la sédimentation argileuses en Méditerranée*, 1971. Université Aix-Marseille, France, 1971.

Coles, G., Whatley, R., and Moguilevsky, A.: The ostracode genus *Krithe* from the Tertiary and Quaternary of the North Atlantic, *Paleontology*, 37, 71-120, 1994.

Cronin, T.M.: [Bathyal ostracodes from the Florida-Hatteras slope, the Straits of Florida, and the Blake Plateau, \*Marine Micropaleontology\*, 8, 2, 89-119, 1983.](#)

Cronin, T. M., DeMartino, D. M., Dwyer, G. S., and Rodriguez-Lazaro, J.: Deep-sea ostracode species diversity: response to late Quaternary climate change, *Marine Micropaleontology*, 37, 231-249, 1999.

Davis, B. A. S., Brewer, S., Stevenson, A. C., and Guiot, J.: The temperature of Europe during the Holocene reconstructed from pollen data, *Quaternary Science Reviews*, 22, 1701-1716, 2003.

De Rijk, S., Jorissen, F. J., Rohling, E. J., and Troelstra, S. R.: Organic flux control on bathymetric zonation of Mediterranean benthic foraminifera, *Marine Micropaleontology*, 40, 151-166, 2000.

Debenay, J.-P. and Redois, F.: Distribution of the twenty seven dominant species of shelf benthic foraminifers on the continental shelf, north of Dakar (Senegal), *Marine Micropaleontology*, 29, 237-255, 1997.

Didié, C., Bauch, H. A., and P. Helmke, J.: Late Quaternary deep-sea ostracodes in the polar and subpolar North Atlantic: paleoecological and paleoenvironmental implications, *Palaeogeography, Palaeoclimatology, Palaeoecology*, 184, 195-212, 2002.

Diz, P. and Francés, G.: Distribution of live benthic foraminifera in the Ría de Vigo (NW Spain), *Marine Micropaleontology*, 66, 165-191, 2008.

Do Carmo, D. A. and Sanguinetti, Y. T.: Taxonomy and palaeoceanographical significance of the genus *Krithe* (Ostracoda) in the Brazilian margin, *Journal of Micropalaeontology*, 18, 111-123, 1999.

Donnici, S. and Serandrei Barbero, R.: The benthic foraminiferal communities of the northern Adriatic continental shelf, *Marine Micropaleontology*, 44, 93-123, 2002.

El Hmadi, A., El Moumni, B., Nachite, D., Bekkali, R., and Gensous, B.: Distribution et caractéristiques des associations d'ostracodes au Pléistocène supérieur et Holocène au niveau de la marge orientale du détroit de Gibraltar (mer d'Alboran, Maroc), *Revue de Micropaléontologie*, 53, 17-28, 2010.

Fairbanks, R. G.: A 17,00-year glacio-eustatic sea-level record: influence of glacial melting rates on the Younger Dryas event and deep-ocean circulation, *Nature*, 342, 637-642, 1989.

Fanget, A.-S., Berné, S., Jouet, G., Bassetti, M.-A., Dennielou, B., Maillet, G. M., and Tondut, M.: Impact of relative sea level and rapid climate changes on the architecture and lithofacies of the Holocene Rhone subaqueous delta (Western Mediterranean Sea), *Sedimentary Geology*, 305, 35-53, 2014.

Fanget, A. S., Bassetti, M. A., Arnaud, M., Chiffolleau, J. F., Cossa, D., Goineau, A., Fontanier, C., Buscail, R., Jouet, G., Maillet, G. M., Negri, A., Dennielou, B., and Berné, S.: Historical evolution and extreme climate events during the last 400 years on the Rhone prodelta (NW Mediterranean), *Marine Geology*, 346, 375-391, 2013a.

- 610 Fanget, A. S., Bassetti, M. A., Berné, S., and Arnaud, M.: Epi-bathyal ostracod assemblage in Holocene Rhone deltaic  
sediments (Gulf of Lions, NW Mediterranean) and their palaeoecological implications, *Revue de Paléobiologie*, 32, 589-606,  
2013b.
- Fontanier, C., Jorissen, F. J., Chaillou, G., David, C., Anschutz, P., and Lafon, V.: Seasonal and interannual variability of  
benthic foraminiferal faunas at 550 m depth in the Bay of Biscay, *Deep Sea Research Part I: Oceanographic Research*  
615 *Papers*, 50, 457-494, 2003.
- Fontanier, C., Jorissen, F. J., Lansard, B., Mouret, A., Buscail, R., Schmidt, S., Kerhervé, P., Buron, F., Zaragosi, S.,  
Hunault, G., Ernoult, E., Artero, C., Anschutz, P., and Rabouille, C.: Live foraminifera from the open slope between Grand  
Rhône and Petit Rhône Canyons (Gulf of Lions, NW Mediterranean), *Deep Sea Research Part I: Oceanographic Research*  
*Papers*, 55, 1532-1553, 2008.
- 620 Frenzel, P. and Boomer, I.: The use of ostracods from marginal marine, brackish waters as bioindicators of modern and  
Quaternary environmental change, *Palaeogeography, Palaeoclimatology, Palaeoecology*, 225, 68-92, 2005.
- Frezza, V. and Carboni, M. G.: Distribution of recent foraminiferal assemblages near the Ombrone River mouth (Northern  
Tyrrhenian Sea, Italy), *Revue de Micropaléontologie*, 52, 43-66, 2009.
- Frigola, J., Canals, M., Cacho, I., Moreno, A., Sierro, F. J., Flores, J. A., Berné, S., Jouet, G., Dennielou, B., Herrera, G.,  
625 Pasqual, C., Grimalt, J. O., Galavazi, M., and Schneider, R.: A 500 kyr record of global sea-level oscillations in the Gulf of  
Lion, Mediterranean Sea: new insights into MIS 3 sea-level variability, *Clim. Past*, 8, 1067-1077, 2012.
- Galloway, W. E.: Process framework for describing the morphologic and stratigraphic evolution of deltaic depositional  
systems. In: *Deltas, Models for Exploration*, Broussard, M. L. (Ed.), Houston Geological Society, 1975.
- Gensous, B. and Tesson, M.: Postglacial deposits of the Rhone shelf: stratigraphic organisation and growth patterns,  
630 *Comptes Rendus de L'Académie des Sciences - Series IIA - Earth and Planetary Science*, 325, 695-701, 1997.
- Gensous, B., Williamson, D., and Tesson, M.: Late-Quaternary transgressive and highstand deposits of a deltaic shelf  
(Rhône delta, France). In: *Sequence stratigraphy and facies associations*, Posamentier, H. W., Summerhayes, C. P., Haq, B.  
A., and Allen, G. P. (Eds.), International Association of Sedimentologists Spec. Pub. 18, Blackwell, Oxford, 1993.
- Giresse, P., Wiewiorka, A., and Grabska, D.: Glauconization processes in the Northwestern Mediterranean (Gulf of Lions),  
635 *Clay Minerals*, 39, 57-73, 2004.
- Gliozzi, E., Rodriguez-Lazaro, J., Nachite, D., Martin-Rubio, M., and Bekkali, R.: An overview of Neogene brackish  
leptocytherids from Italy and Spain: Biochronological and palaeogeographical implications, *Palaeogeography,*  
*Palaeoclimatology, Palaeoecology*, 225, 283-301, 2005.
- Goehring, B. M., Schaefer, J. M., Schluechter, C., Lifton, N. A., Finkel, R. C., Jull, A. J. T., Akçar, N., and Alley, R. B.: The  
640 Rhone Glacier was smaller than today for most of the Holocene, *Geology*, 39, 679-682, 2011.
- Goineau, A.: *Ecologie des foraminifères benthiques dans le prodelta du Rhône. Détermination de bio-indicateurs*  
*environnementaux et reconstitution historique d'une anthropisation récente*, 2011. PhD Université d'Angers, Angers, 310 pp.,  
2011.

Goineau, A., Fontanier, C., Jorissen, F. J., Lansard, B., Buscail, R., Mouret, A., Kerhervé, P., Zaragosi, S., Ernoult, E.,  
645 Artéro, C., Anschutz, P., Metzger, E., and Rabouille, C.: Live (stained) benthic foraminifera from the Rhône prodelta (Gulf  
of Lion, NW Mediterranean): Environmental controls on a river-dominated shelf, *Journal of Sea Research*, 65, 58-75, 2011.

Goineau, A., Fontanier, C., Mojtahid, M., Fanget, A. S., Bassetti, M. A., Berné, S., and Jorissen, F.: Live–dead comparison  
of benthic foraminiferal faunas from the Rhône prodelta (Gulf of Lions, NW Mediterranean): Development of a proxy for  
palaeoenvironmental reconstructions, *Marine Micropaleontology*, 119, 17-33, 2015.

650 Guernet, C., Lemeille, F., Sorel, D., Bourdillon, C., Berge-Thierry, C., and Manakou, M.: Les Ostracodes et le Quaternaire  
d'Aigion (golfe de Corinthe, Grèce), *Revue de Micropaléontologie*, 46, 73-93, 2003.

Guillén, J., Bourrin, F., Palanques, A., Durrieu de Madron, X., Puig, P., and Buscail, R.: Sediment dynamics during wet and  
dry storm events on the Tet inner shelf (SW Gulf of Lions), *Marine Geology*, 234, 129-142, 2006.

Hammer, O., Harper, D. A. T., and Ryan, P. D.: PAST: paleontological statistics software package for education and data  
655 analysis, *Palaeontologia Electronica*, 4, 4-9, 2001.

Hayek, L. E. C. and Buzas, M. A.: *Surveying Natural Populations*, Columbia University Press, New York, 563 pp., 1997.

[Heier-Nielsen, S., Conradsen, K., Heinemeier, J., Knudsen, K.L., Nielsen, H.L., Rud, N., and Sveinbjönsdóttir, A.E.:  
Radiocarbon dating of shells and foraminifera from the Skagen core, Denmark: evidence of reworking, \*Radiocarbon\*, 37,  
119-130, 1995.](#)

660 Ivy-Ochs, S., Kerschner, H., Maisch, M., Christl, M., Kubik, P. W., and Schlüchter, C.: Latest Pleistocene and Holocene  
glacier variations in the European Alps, *Quaternary Science Reviews*, 28, 2137-2149, 2009.

Jalali, B., Sicre, M. A., Bassetti, M. A., and Kallel, N.: Holocene climate variability in the North-Western Mediterranean Sea  
(Gulf of Lions), *Clim. Past*, 12, 91-101, 2016.

Javaux, E. and Scott, D. B.: Illustration of modern benthic foraminifera from Bermuda and remarks on distribution in other  
subtropical/tropical areas, *Palaeontologia Electronica*, 6, 29 pp., 2003.

665 Jorissen, F.: Benthic foraminifera from the Adriatic Sea: principles of phenotypic variation, *Utrecht Micropaleontology  
Bulletin*, 37, 1-174, 1988.

Jorissen, F. J.: The distribution of benthic foraminifera in the Adriatic Sea, *Marine Micropaleontology*, 12, 21-48, 1987.

Kruit, C.: Sediments of the Rhône delta: Grain Size and Microfauna, Mouton and Co, La Haye, 1955. p. 357-555, 1955.

670 L'Homer, A., Bazile, F., Thommeret, J., and Thommeret, Y.: Principales étapes de l'édification du delta du Rhône de 7000  
B.P. à nos jours ; variations du niveau marin, *Oceanis*, 7, 389-408, 1981.

Labaune, C., Jouet, G., Berné, S., Gensous, B., Tesson, M., and Delpeint, A.: Seismic stratigraphy of the Deglacial deposits  
of the Rhone prodelta and of the adjacent shelf, *Marine Geology*, 222-223, 299-311, 2005.

Liu, J. P., Milliman, J. D., Gao, S., and Cheng, P.: Holocene development of the Yellow River's subaqueous delta, North  
675 Yellow Sea, *Marine Geology*, 209, 45-67, 2004a.

Liu, Z., Berne, S., Saito, Y., Yu, H., Trentesaux, A., Uehara, K., Yin, P., Paul Liu, J., Li, C., Hu, G., and Wang, X.: Internal  
architecture and mobility of tidal sand ridges in the East China Sea, *Continental Shelf Research*, 27, 1820-1834, 2007.

Liu, Z., Colin, C., Trentesaux, A., Blamart, D., Bassinot, F., Siani, G., and Sicre, M.-A.: Erosional history of the eastern Tibetan Plateau since 190 kyr ago: clay mineralogical and geochemical investigations from the southwestern South China Sea, *Marine Geology*, 209, 1-18, 2004b.

Liu, Z., Tuo, S., Colin, C., Liu, J. T., Huang, C.-Y., Selvaraj, K., Chen, C.-T. A., Zhao, Y., Siringan, F. P., Boulay, S., and Chen, Z.: Detrital fine-grained sediment contribution from Taiwan to the northern South China Sea and its relation to regional ocean circulation, *Marine Geology*, 255, 149-155, 2008.

Lofi, J., Rabineau, M., Gorini, C., Berne, S., Clauzon, G., De Clarens, P., Tadeu Dos Reis, A., Mountain, G. S., Ryan, W. B. F., Steckler, M. S., and Fouchet, C.: Plio-Quaternary prograding clinoform wedges of the western Gulf of Lion continental margin (NW Mediterranean) after the Messinian Salinity Crisis, *Marine Geology*, 198, 289-317, 2003.

[Loureiro, I.M., Cabral, M.C., and Fatela, F.: Marine influence in ostracod assemblages of the Mira River estuary: comparison between lower and mid estuary tidal marsh transects, \*Journal of Coastal Research\*, 56, 2, 1365-1369, 2009.](#)

Magny, M., Arnaud, F., Holzhauser, H., Chapron, E., Debret, M., Desmet, M., Leroux, A., Millet, L., Revel, M., and Vannière, B.: Solar and proxy-sensitivity imprints on paleohydrological records for the last millennium in west-central Europe, *Quaternary Research*, 73, 173-179, 2010.

[Magny, M.: Holocene climate variability as reflected by mid-European lake-level fluctuations and its probable impact on prehistoric human settlements, \*Quaternary International\*, 113, 1, 65-79, 2004.](#)

[Magny, M.](#) and Begeot, C.: Hydrological changes in the European midlatitudes associated with freshwater outbursts from Lake Agassiz during the Younger Dryas event and the early Holocene, *Quaternary Research*, 61, 181-192, 2004.

Magny, M., Bégeot, C., Guiot, J., and Peyron, O.: Contrasting patterns of hydrological changes in Europe in response to Holocene climate cooling phases, *Quaternary Science Reviews*, 22, 1589-1596, 2003.

Magny, M., Combourieu-Nebout, N., de Beaulieu, J. L., Bout-Roumazeilles, V., Colombaroli, D., Desprat, S., Francke, A., Joannin, S., Ortu, E., Peyron, O., Revel, M., Sadori, L., Siani, G., Sicre, M. A., Samartin, S., Simonneau, A., Tinner, W., Vannière, B., Wagner, B., Zanchetta, G., Anselmetti, F., Brugiapaglia, E., Chapron, E., Debret, M., Desmet, M., Didier, J., Essallami, L., Galop, D., Gilli, A., Haas, J. N., Kallel, N., Millet, L., Stock, A., Turon, J. L., and Wirth, S.: North-South palaeohydrological contrasts in the central Mediterranean during the Holocene: tentative synthesis and working hypotheses, *Clim. Past*, 9, 2043-2071, 2013.

Magny, M. and Haas, J. N.: A major widespread climatic change around 5300 cal. yr BP at the time of the Alpine Iceman, *Journal of Quaternary Science*, 19, 423-430, 2004.

[Martinez-Ruiz, F., Kastner, M., Gallego-Torres, D., Rodrigo-Gámiz, M., Nieto-Moreno, V., and Ortega-Huertas, M.: Paleoclimate and paleoceanography over the past 20.000 yr in the Mediterranean Sea Basins as indicated by sediment elemental proxies, \*Quaternary Science Reviews\*, 107, 25-46, 2015.](#)

Mayewski, P. A., Rohling, E. E., Curt Stager, J., Karlén, W., Maasch, K. A., David Meeker, L., Meyerson, E. A., Gasse, F., van Krevel, S., Holmgren, K., Lee-Thorp, J., Rosqvist, G., Rack, F., Staubwasser, M., Schneider, R. R., and Steig, E. J.: Holocene climate variability, *Quaternary Research*, 62, 243-255, 2004.

- Mendes, I., Gonzalez, R., Dias, J. M. A., Lobo, F., and Martins, V.: Factors influencing recent benthic foraminifera distribution on the Guadiana shelf (Southwestern Iberia), *Marine Micropaleontology*, 51, 171-192, 2004.
- 715 Milker, Y., Schmiedl, G., and Betzler, C.: Paleobathymetric history of the Western Mediterranean Sea shelf during the latest glacial period and the Holocene: Quantitative reconstructions based on foraminiferal transfer functions, *Palaeogeography, Palaeoclimatology, Palaeoecology*, 307, 324-338, 2011.
- Mix, A. C., Bard, E., and Schneider, R.: Environmental processes of the ice age: land, oceans, glaciers (EPILOG), *Quaternary Science Reviews*, 20, 627-657, 2001.
- 720 Mojtahid, M., Jorissen, F., Lansard, B., Fontanier, C., Bombled, B., and Rabouille, C.: Spatial distribution of live benthic foraminifera in the Rhône prodelta: Faunal response to a continental-marine organic matter gradient, *Marine Micropaleontology*, 70, 177-200, 2009.
- Murray, J. W.: *Ecology and applications of benthic foraminifera*, Cambridge University Press, Cambridge, 426 pp., 2006.
- Myrow, P. M.: Bypass-zone tempestite facies model and proximity trends for an ancient muddy shoreline and shelf, *Journal of Sedimentary Petrology*, 62, 99-115, 1992.
- 725 Myrow, P. M. and Southard, J. B.: Tempestite deposition, *Journal of Sedimentary Research*, 66, 875-887, 1996.
- Nittrouer, C. A., Kuehl, S. A., DeMaster, D. J., and Kowsmann, R. O.: The deltaic Nature of Amazon Shelf Sedimentation., *Geological Society of America Bulletin*, 97, 444-458, 1986.
- Pérez-López, A. and Pérez-Valera, F.: Tempestite facies models for the epicontinental Triassic carbonates of the Betic Cordillera (southern Spain), *Sedimentology*, 59, 646-678, 2012.
- 730 Petschick, R.: MacDiff 4.2.2. (Online), Available: <http://servermac.geologie.un-frankfurt.de/Reiner.html>, 2000.
- Peypouquet, J. P. and Nachite, D.: Les ostracodes en Méditerranée nord-occidentale In: *Ecologie des microorganismes en Méditerranée occidentale 'ECOMED'*, Bizon, J. J. and Burolet, P. F. (Eds.), Association Française des Techniciens du Pétrole, Paris, 1984.
- 735 Pichard, G.: Les crues sur le bas-Rhône de 1500 à nos jours. Pour une histoire hydroclimatique., *Méditerranée*, 3-4, 105-116, 1995.
- Pichard, G. and Roucaute, E.: Sept siècles d'histoire hydroclimatique du Rhône d'Orange à la mer (1300-2000), climat, crues, inondations, *Méditerranée*, n° hors-série, 192, 2014.
- Postma, G.: Sea-level-related architectural trends in coarse-grained delta complexes, *Sedimentary Geology*, 98, 3-12, 1995.
- 740 Provansal, M., Vella, C., Arnaud-Fassetta, G., Sabatier, F., and Maillet, G.: Role of fluvial sediment inputs in the mobility of the Rhône delta coast (France), *Géomorphologie: relief, processus, environnement*, 4, 271-282, 2003.
- Reimer, P. J., Bard, E., Bayliss, A., Beck, J. W., Blackwell, P. G., Bronk Ramsey, C., Buck, C. E., Cheng, H., Edwards, R. L., Friedrich, M., Grootes, P. M., Guilderson, T. P., Haflidason, H., Hajdas, I., Hatté, C., Heaton, T. J., Hoffmann, D. L., Hogg, A. G., Hughen, K. A., Kaiser, K. F., Kromer, B., Manning, S. W., Niu, M., Reimer, R. W., Richards, D. A., Scott, E. M., Southon, J. R., Staff, R. A., Turney, C. S. M., and van der Plicht, J.: *IntCal13 and Marine13 Radiocarbon Age Calibration Curves 0–50,000 Years cal BP*, 2013.
- 745

- Rey, T., Lefevre, D., and Vella, C.: Données nouvelles sur les lobes deltaïques du paléogolfe d'Aigues-Mortes à l'Holocène (Petite Camarhuc, France), *Quaternaire*, 16, 329-338, 2005.
- Richter, T. O., Van der Gaast, S., Koster, B., Vaars, A., Gieles, R., de Stigter, H. C., De Haas, H., and Van Weering, T. C. E.: The Avaatech XRF Core Scanner: technical description and applications to NE Atlantic sediments. In: *Techniques in Sediment Core Analysis*, Rothwell, R. G. (Ed.), Geological Society, Special Publications, London, 2006.
- 750 Roberts, N., Brayshaw, D., Kuzucuoğlu, C., Perez, R., and Sadori, L.: The mid-Holocene climatic transition in the Mediterranean: Causes and consequences, *The Holocene*, 21, 3-13, 2011.
- Rossi, V.: Ostracod assemblages from Holocene subsurface deposits of modern Po Delta: a palaeoenvironmental proxy record, *Bolletino della Società Paleontologica Italiana*, 48, 95-103, 2009.
- 755 Rossi, V. and Vaiani, S. C.: Benthic foraminiferal evidence of sediment supply changes and fluvial drainage reorganization in Holocene deposits of the Po Delta, Italy, *Marine Micropaleontology*, 69, 106-118, 2008.
- Ruiz, F., González-Regalado, M. L., and Muñoz, J. M.: Multivariate analysis applied to total and living fauna: seasonal ecology of recent benthic Ostracoda off the North Cádiz Gulf coast (southwestern Spain), *Marine Micropaleontology*, 31, 183-203, 1997.
- 760 Seppä, H., Björne, A. E., Telford, R. J., Birks, H. J. B., and Veski, S.: Last nine-thousand years of temperature variability in Northern Europe, *Clim. Past*, 5, 523-535, 2009.
- Sgarrella, F. and Moncharmont Zei, M.: Benthic foraminifera of the Gulf of Naples (Italy): systematics and autoecology, *Bollettino Società Paleontologica Italiana*, 32, 145-264, 1993.
- Shannon, C. E.: A mathematical theory of communication, *The Bell System Technical J.*, 27, 379-423, 623-656, 1948.
- 765 Sierro, F. J., Andersen, N., Bassetti, M. A., Berné, S., Canals, M., Curtis, J. H., Dennielou, B., Flores, J. A., Frigola, J., Gonzalez-Mora, B., Grimalt, J. O., Hodell, D. A., Jouet, G., Pérez-Folgado, M., and Schneider, R.: Phase relationship between sea level and abrupt climate change, *Quaternary Science Reviews*, 28, 2867-2881, 2009.
- Simonneau, A., Doyen, E., Chapron, E., Millet, L., Vannière, B., Di Giovanni, C., Bossard, N., Tachikawa, K., Bard, E., Albéric, P., Desmet, M., Roux, G., Lajeunesse, P., Berger, J. F., and Arnaud, F.: Holocene land-use evolution and associated soil erosion in the French Prealps inferred from Lake Paladru sediments and archaeological evidences, *Journal of Archaeological Science*, 40, 1636-1645, 2013.
- 770 Smith, D. E., Harrison, S., Firth, C. R., and Jordan, J. T.: The early Holocene sea level rise, *Quaternary Science Reviews*, 30, 1846-1860, 2011.
- Stanford, J. D., Hemingway, R., Rohling, E. J., Challenor, P. G., Medina-Elizalde, M., and Lester, A. J.: Sea-level probability for the last deglaciation: A statistical analysis of far-field records, *Global and Planetary Change*, 79, 193-203, 2011.
- 775 Stanley, D. J. and Warne, A. G.: Worldwide initiation of Holocene marine deltas by deceleration of sea-level rise, *Science*, 265, 228-231, 1994.



Swindles, G. T., Plunkett, G., and Roe, H. M.: A delayed climatic response to solar forcing at 2800 cal. BP: multiproxy evidence from three Irish peatlands, *The Holocene*, 17, 177-182, 2007.

Ta, T. K. O., Nguyen, V. L., Tateishi, M., Kobayashi, I., Tanabe, S., and Saito, Y.: Holocene delta evolution and sediment discharge of the Mekong River, southern Vietnam, *Quaternary Science Reviews*, 21, 1807-1819, 2002.

Trincardi, F., Cattaneo, A., and Correggiari, A.: Mediterranean prodelta systems: natural evolution and human impact investigated by Eurodelta, *Oceanography*, 17, 34-45, 2004.

Van der Zwaan, G. J. and Jorissen, F.: Biofacial patterns in river-induced shelf anoxia, *Modern and Ancient Continental Shelf Anoxia: Geological Society, Special Publication*, 58, 65-82, 1991.

[Van Harten, D.: Use of ostracodes to recognize downslope contamination in paleobathymetry and a preliminary reappraisal of the paleodepth of the Prasás Marls \(Pliocene\), Crete, Greece, \*Geology\*, 14, 10, 856-859, 1986.](#)

Van Morkhoven, F. P. C. M.: Post-Palaeozoic Ostracoda. Their Morphology, Taxonomy, and Economic Use, Vol. 2, Generic descriptions, Elsevier Publishing, Amsterdam, 1963.

Vella, C.: Perception et évaluation de la mobilité du littoral holocène sur la marge orientale du delta du Rhône, 1999.PhD, UFR des Sciences géographiques et de l'aménagement, Aix-Marseille 1, Aix, 225 pp., 1999.

Vella, C., Fleury, T. J., Gensous, B., Labaune, C., and Tesson, M.: Holocene long-sequences and sedimentary discontinuities of the Rhône delta, *Cahier de Géographie*, 6, 159-170, 2008.

Vella, C., Fleury, T. J., Raccasi, G., Provansal, M., Sabatier, F., and Bourcier, M.: Evolution of the Rhone delta plain in the Holocene, *Marine Geology*, 222-223, 235-265, 2005.

Walker, M. J. C., Berkelhammer, M., Björck, S., Cwynar, L. C., Fisher, D. A., Long, A. J., Lowe, J. J., Newnham, R. M., Rasmussen, S. O., and Weiss, H.: Formal subdivision of the Holocene Series/Epoch: a Discussion Paper by a Working Group of INTIMATE (Integration of ice-core, marine and terrestrial records) and the Subcommission on Quaternary Stratigraphy (International Commission on Stratigraphy), *Journal of Quaternary Science*, 27, 649-659, 2012.

Wanner, H., Beer, J., Bütikofer, J., Crowley, T. J., Cubasch, U., Flückiger, J., Goosse, H., Grosjean, M., Joos, F., Kaplan, J. O., Küttel, M., Müller, S. A., Prentice, I. C., Solomina, O., Stocker, T. F., Tarasov, P., Wagner, M., and Widmann, M.: Mid-to Late Holocene climate change: an overview, *Quaternary Science Reviews*, 27, 1791-1828, 2008.

Wanner, H., Mercolli, L., Grosjean, M., and Ritz, S. P.: Holocene climate variability and change; a data-based review, *Journal of the Geological Society*, doi: 10.1144/jgs2013-101, 2014. 2014.

Wanner, H., Solomina, O., Grosjean, M., Ritz, S. P., and Jetel, M.: Structure and origin of Holocene cold events, *Quaternary Science Reviews*, 30, 3109-3123, 2011.

[Wassenburg, J.A., Immenhauser, A., Richter, D.K., Niedermayr, A., Riechelmann, S., Fietzke, D., Scholz, D., Jochum, K.P., Fohlmeister, J., Schröder-Ritzrau, A., Sabaoui, A., Riechelmann, D.F.C., Schneider, L., and Esper, J.: Moroccan speleothem and tree ring records suggest a variable positive state of the North Atlantic Oscillation during the Medieval Warm Period, \*Earth and Planetary Science Letters\*, 375, 291-302, 2013.](#)

- Weiss, B.: The decline of Late Bronze Age civilization as a possible response to climatic change, *Climatic Change*, 4, 173-198, 1982.
- 815 | [Wilhelm, B., Vogel, C., Crouzet, C., Etienne, D., and Anselmetti, F.S.: Frequency and intensity of palaeofloods at the interface of Atlantic and Mediterranean climate domains, \*Climate of the Past\*, 12, 299-316, 2016.](#)
- Xue, Z., Liu, J. P., DeMaster, D., Van Nguyen, L., and Ta, T. K. O.: Late Holocene Evolution of the Mekong Subaqueous Delta, Southern Vietnam, *Marine Geology*, 269, 46-60, 2010.
- Yamaguchi, T. and Norris, R. D.: Deep-sea ostracode turnovers through the Paleocene–Eocene thermal maximum in DSDP Site 401, Bay of Biscay, North Atlantic, *Marine Micropaleontology*, 86–87, 32-44, 2012.
- 820 | Zaïbi, C., Carbonel, P., Kamoun, F., Fontugne, M., Azri, C., Jedoui, Y., and Montacer, M.: Evolution of the sebkha Dreïaa (South-Eastern Tunisia, Gulf of Gabes) during the Late Holocene: Response of ostracod assemblages, *Revue de Micropaléontologie*, 55, 83-97, 2012.
- | [Zhou, B., and Zhao, Q.: Allochthonous ostracods in the South China Sea and their significance in indicating downslope sediment contamination, \*Marine Geology\*, 156, 1-4, 187-195, 1999.](#)

825

| Event | Time slice (kyr) | References                                     |
|-------|------------------|------------------------------------------------|
| CR0   | 8.2              | Barber et al. (1999)                           |
| CR1   | 6.4-6.2          | Wanner et al. (2011)                           |
| CR2   | 5.3-5.0          | Magny and Haas (2004), Roberts et al. (2011)   |
| CR3   | 4.2-3.9          |                                                |
| CR4   | 2.8-3.1          | Chambers et al. (2007), Swindles et al. (2007) |
| CR5   | 1.45-1.65        | Wanner et al. (2011)                           |
| CR6   | 0.65-0.45        | Wanner et al. (2011)                           |

**Table 1: Chronology of Holocene cold relapses (CR) based on existing literature.**

| Depth (cm) | Material                                                   | Weight (mg) | Sample number | <sup>14</sup> C conventional age (yr BP) | Calibrated age (yr cal. BP) | Mean calibrated age (yr cal. BP) |
|------------|------------------------------------------------------------|-------------|---------------|------------------------------------------|-----------------------------|----------------------------------|
| 90-93      | Benthic foraminifera                                       | 9.5         | SacA 27201    | 1335 ± 30                                | 790-944                     | 867                              |
| 120-123    | Benthic foraminifera                                       | 9.9         | SacA 27202    | 1840 ± 30                                | 1300-1477                   | 1389                             |
| 150-153    | Benthic foraminifera                                       | 11          | SacA 23204    | 2080 ± 35                                | 1551-1761                   | 1656                             |
| 200-203    | Benthic foraminifera                                       | 10.6        | SacA 23205    | 1655 ± 30                                | 1154-1282                   | 1218                             |
| 300-303    | Benthic Foraminifera+ <i>Turritella</i> sp                 | 10.9        | SacA 23206    | 1900 ± 30                                | 1362-1527                   | 1445                             |
| 335-336    | Benthic Foraminifera+ <i>Turritella</i> sp+ mixed bivalves | 10          | SacA 23207    | 1705 ± 30                                | 1185-1318                   | 1252                             |
| 350-353    | Benthic foraminifera                                       | 11.3        | SacA 27203    | 2760 ± 35                                | 2351-2619                   | 2485                             |
| 417-420    | <i>Turritella</i> sp                                       | 896         | Poz-35061     | 4335 ± 35                                | 4375-4574                   | 4475                             |
| 430-433    | Benthic foraminifera                                       | 10.5        | SacA 27204    | 6190 ± 40                                | 6513-6735                   | 6624                             |
| 440-443    | <i>Nucula</i> sp                                           | 11.2        | SacA 27205    | 7830 ± 40                                | 8192-8374                   | 8283                             |
| 470-473    | Benthic foraminifera                                       | 10.2        | SacA 23208    | 8565 ± 35                                | 9075-9333                   | 9204                             |
| 510-513    | <i>Elphidium crispum</i>                                   | 10.1        | SacA 23209    | 10790 ± 40                               | 12058-12467                 | 12263                            |
| 670-673    | Benthic foraminifera                                       | 13          | SacA 23210    | 11855 ± 45                               | 13215-13433                 | 13324                            |
| 730-733    | <i>Elphidium crispum</i>                                   | 10.6        | SacA 23211    | 11280 ± 40                               | 12644-12870                 | 12757                            |

**Table 2: Summary of <sup>14</sup>C dates.** Absolute dates were obtained with accelerator mass spectrometer (AMS) <sup>14</sup>C dating of well-preserved shells and benthic foraminifera at Laboratoire de Mesure <sup>14</sup>C (LMC14) at Commissariat à l’Energie Atomique (CEA, Saclay) and at Poznan Radiocarbon Laboratory (PRL). The ages reported herein are delta <sup>13</sup>C-normalised conventional <sup>14</sup>C years, corrected for an assumed airsea reservoir effect of 400 years. Calendar ages were calculated using clam software (Blaauw, 2010) and the Marine 13 calibration curve (Reimer et al., 2013).

830

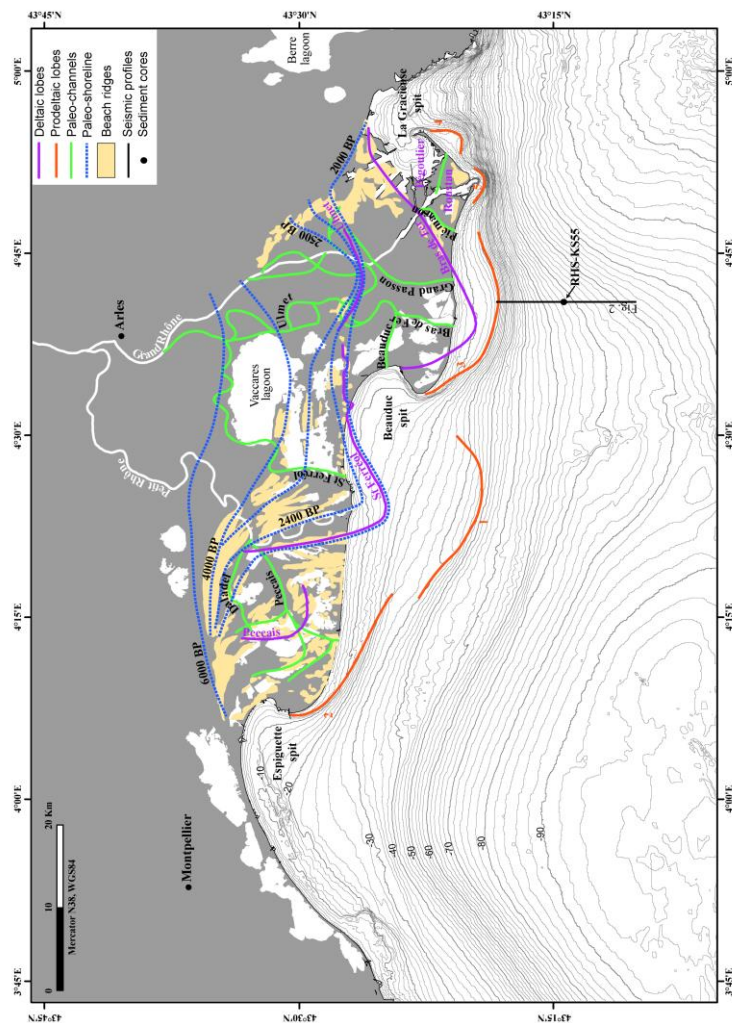

Figure 1: Offshore and onshore morphology of the Rhone deltaic system. This map is based on the compilation of Berné et al. (2007) and Vella et al. (2008). The successive shifting of the Rhone distributaries under natural and/or anthropic influence during the middle and late Holocene led to the formation of several deltaic lobes. Steps in the present-day morphology correspond to the position of the paleo-delta fronts that can be linked to known paleo-distributaries of the Rhone: (1) early Saint Ferréol; (2) Peccais; (3) Bras de Fer; (4) Pégoulie (5) and modern Roustan distributary. The map of relict morpho-sedimentary units in the Rhone delta plain (paleo-shorelines, beach ridges and onshore deltaic lobes) is based on L'Homer et al. (1981), Arnaud-Fassetta (1998), Vella (1999) and Provansal et al. (2003). Thick line and black dot correspond respectively to chirp seismic profile (Fig. 2) and sediment core RHKS-55 presented in this study.

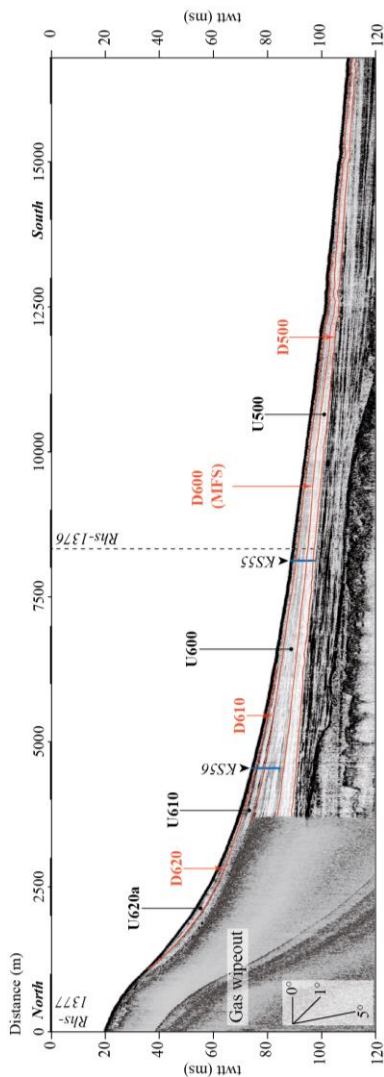

Figure 2: “Dip” (NS) chirp seismic profile across the Grand Passon and Bras de Fer subaqueous delta (position in Fig. 1). Surface D500 corresponds to the flooding surface (that coincides here with a wave ravinement surface) that separates the Younger Dryas (seismic unit U400) deposits from the Preboreal deposits (seismic unit U500). The downlap surface D600 is the Maximum Flooding Surface formed during the turnaround between retrogradation and progradation. D610 and D620 are erosional surfaces that mimic flooding surfaces and separate the middle and late Holocene sedimentary wedges (seismic units U600, U610 and U620a) formed in response to the successive shifts of Rhone Channel.

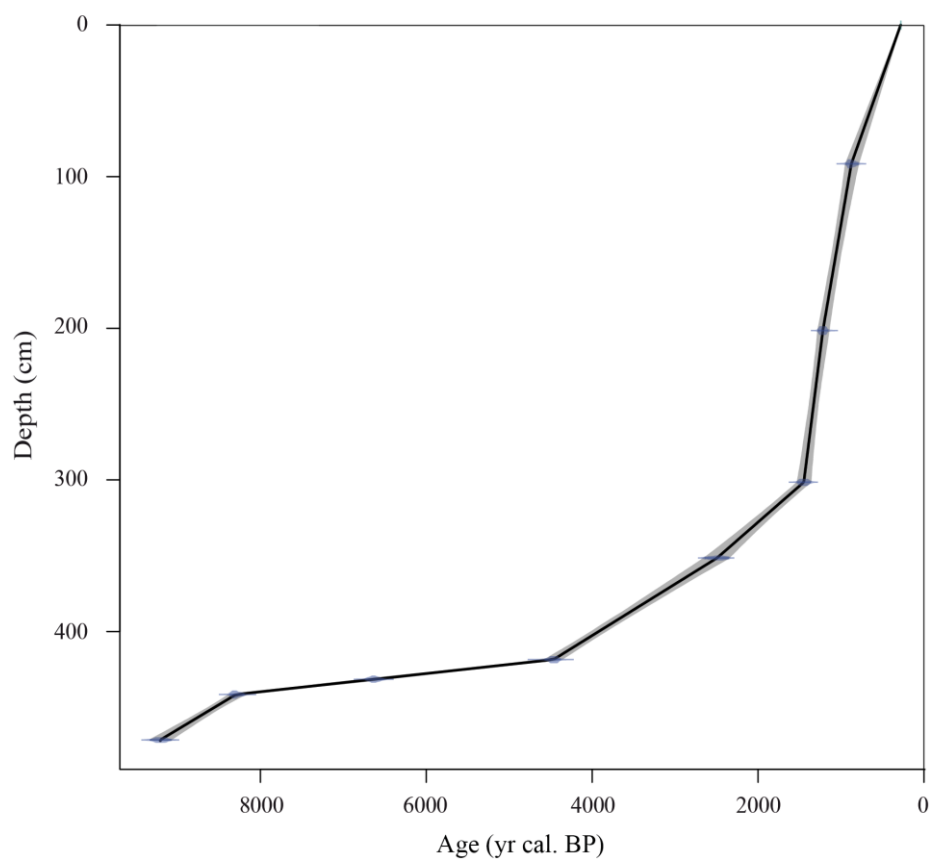

Figure 3: Age model for the upper part (middle and late Holocene) of core RHS-KS55 based on linear interpolation using the Clam 2.2 software (Blaauw, 2010).

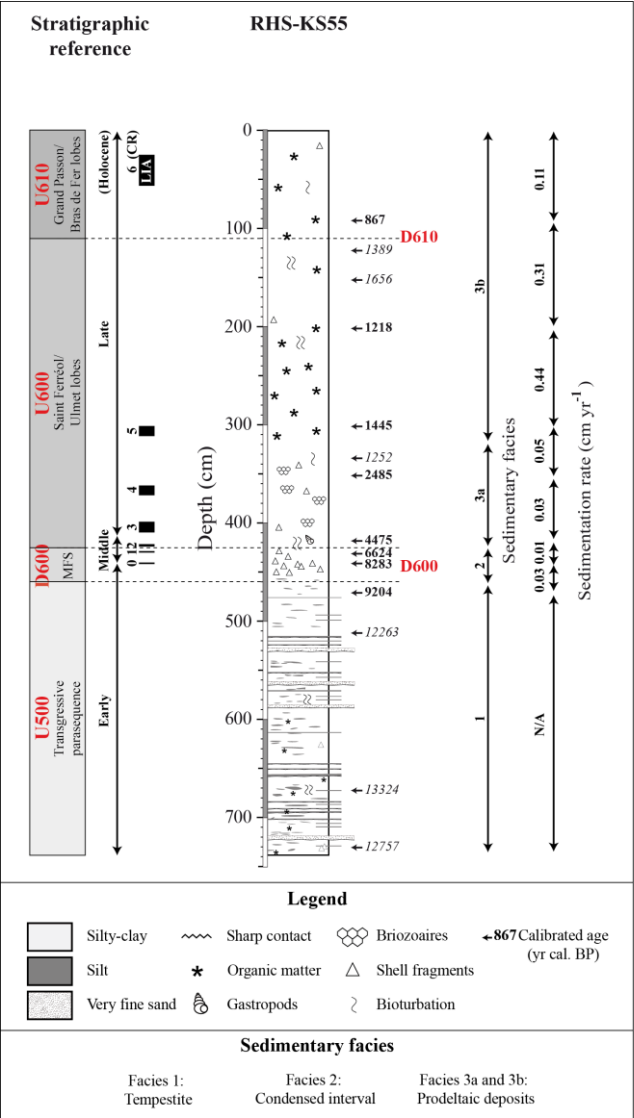

850 **Figure 4: Sediment features and sedimentation rates of core RHS-KS55. Correlations with seismic units and the Holocene chronology are shown. Black rectangles on the left side of the figure represent the most significant periods of climate deterioration (known as Cold Relapses ([CRCRs](#)), Wanner et al., 2014) during the Holocene (e.g. the 8.2 ka event, [and](#) the Little Ice Age).**



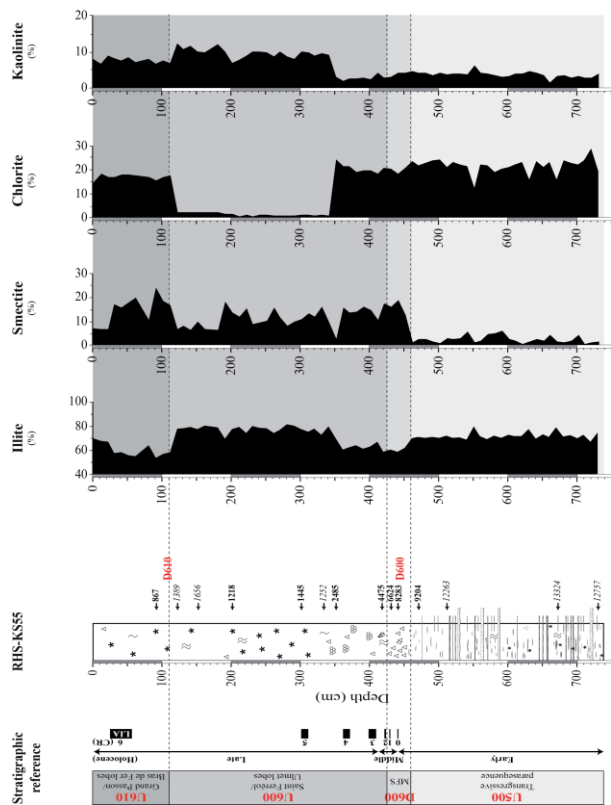

Figure 5: Distribution of the main clay minerals and bulk intensity of Ti in core RHS-KS55. Correlations with seismic units and Holocene cooling events are shown on the left side of the figure.

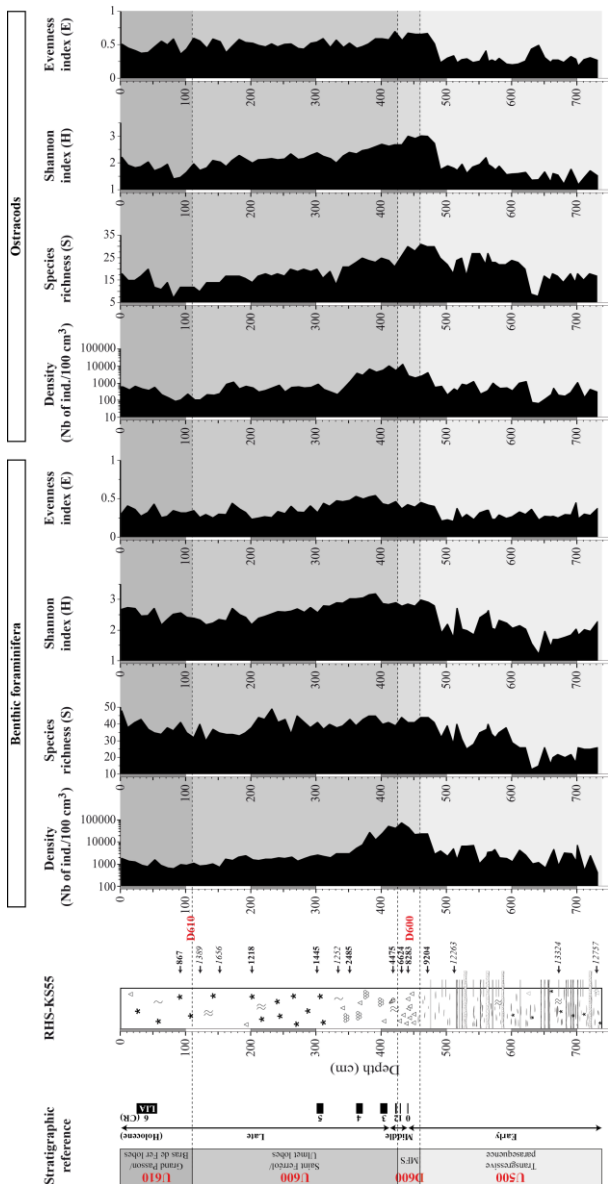

Figure 6: Ecological indices (total abundance per 100 cm<sup>3</sup>, number of species (S), Shannon (H) and Evenness (E) index) describing benthic foraminiferal and ostracod populations. Correlations with seismic units and Holocene cooling events are shown on the left side of the figure.

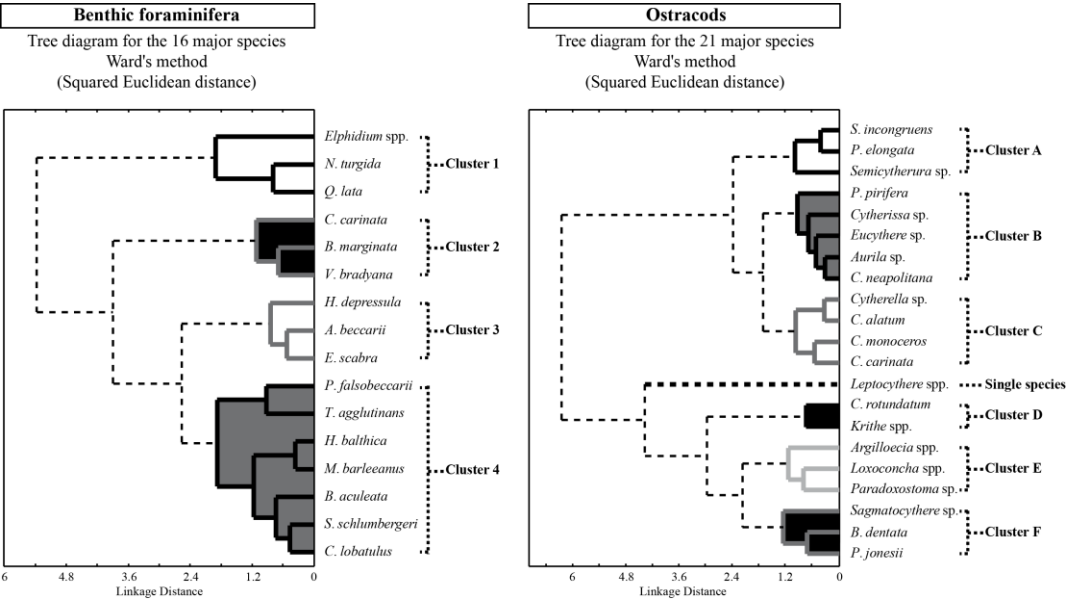

Figure 7: R-mode cluster analyses of the 16 major (more than 5% in at least one sample) benthic foraminiferal species, and of the 21 major ostracod species according to Ward's method, based on standardized percentages pi of these species.



are also observed at the core site. 1.3 and 1.1 ka cal. BP. Conversely, the Migration Period Cooling (CR5) and the Medieval Climate Anomaly (MCA) corresponds to period of increased dryness.

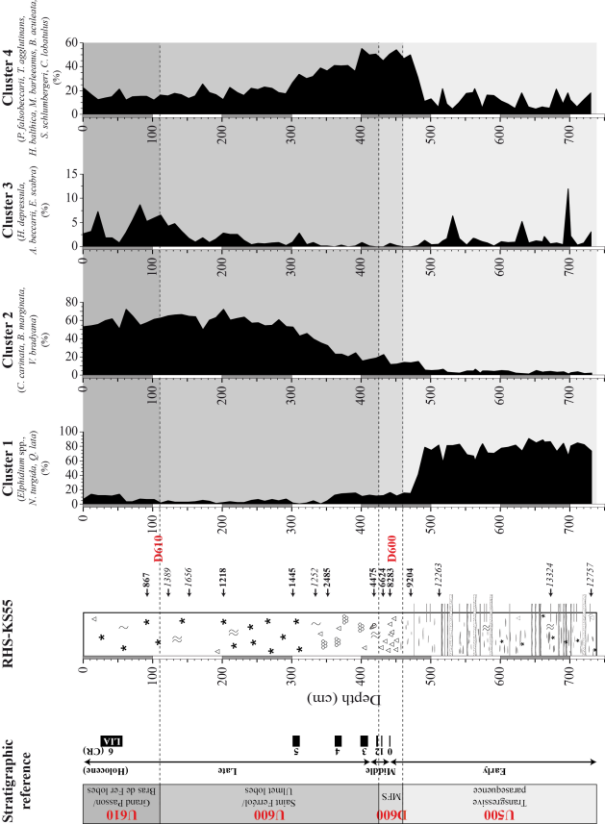

Figure 9: Cumulative percentages of taxa composing the defined benthic foraminiferal clusters along core RHS-KS55. Correlations with seismic units and Holocene cooling events are shown on the left side of the figure.
